# Supplementary material
Source: PubMed Central journal article supplement (PMC3123413)

# **Synthesis and Reactivity of Unique Heterocyclic Structures en route to Substituted Diamines**

**Spectral Data**

*(41 pages)*

David E. Olson, Autumn Maruniak, Sushant Malhotra, Barry M. Trost, and J. Du Bois \*

*Department of Chemistry*

*Stanford University*

*Stanford, CA 94305-5080*

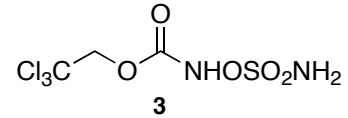

STANDARD 1H OBSERVE

Archive directory:  
/export/home/deolson/vnmrsws/data  
Sample directory:

File: DDE97-1

Pulse Sequence: s2pul  
Solvent: CD3CN

Relax. delay 0.500 sec  
Pulse 59.0 degrees  
Acq. time 4.002 sec  
Width 4997.5 Hz  
16 repetitions  
OBSERVE H1, 400.1136633 MHz  
DATA PROCESSING  
FT size 65536  
Total time 1 min

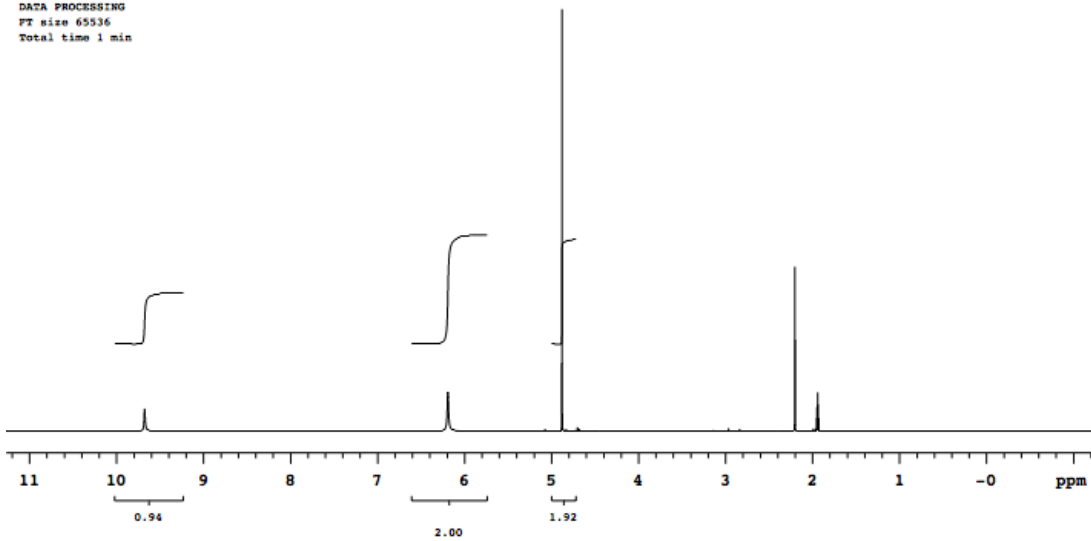

13C OBSERVE

Archive directory:  
/export/home/deolson/vnmrsws/data  
Sample directory:

File: DDE97-2

Pulse Sequence: s2pul  
Solvent: CD3CN

Relax. delay 0.500 sec  
Pulse 35.2 degrees  
Acq. time 1.199 sec  
Width 25000.0 Hz  
32 repetitions  
OBSERVE C13, 100.6085835 MHz  
DECOUPLE H1, 400.1156728 MHz  
Power 43 dB  
continuously on  
WALTZ-16 modulated  
DATA PROCESSING  
Line broadening 0.5 Hz  
FT size 65536  
Total time 29 min

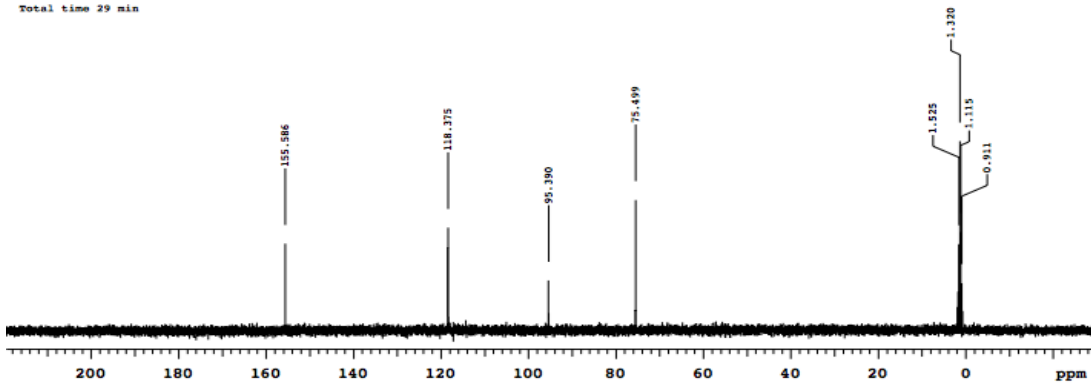

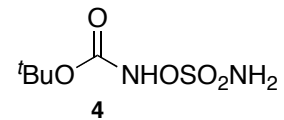

STANDARD IN OBSERVE

Archive directory:  
/export/home/deolson/vnmrsvs/data  
Sample directory:

File: DEOC17-2

Pulse Sequence: s2pul  
Solvent: CD3CN

Relax. delay 0.500 sec  
Pulse 59.0 degrees  
Acq. time 4.002 sec  
Width 4997.5 Hz  
16 repetitions  
OBSERVE H1, 400.113633 MHz  
DATA PROCESSING  
FT size 65536  
Total time 1 min

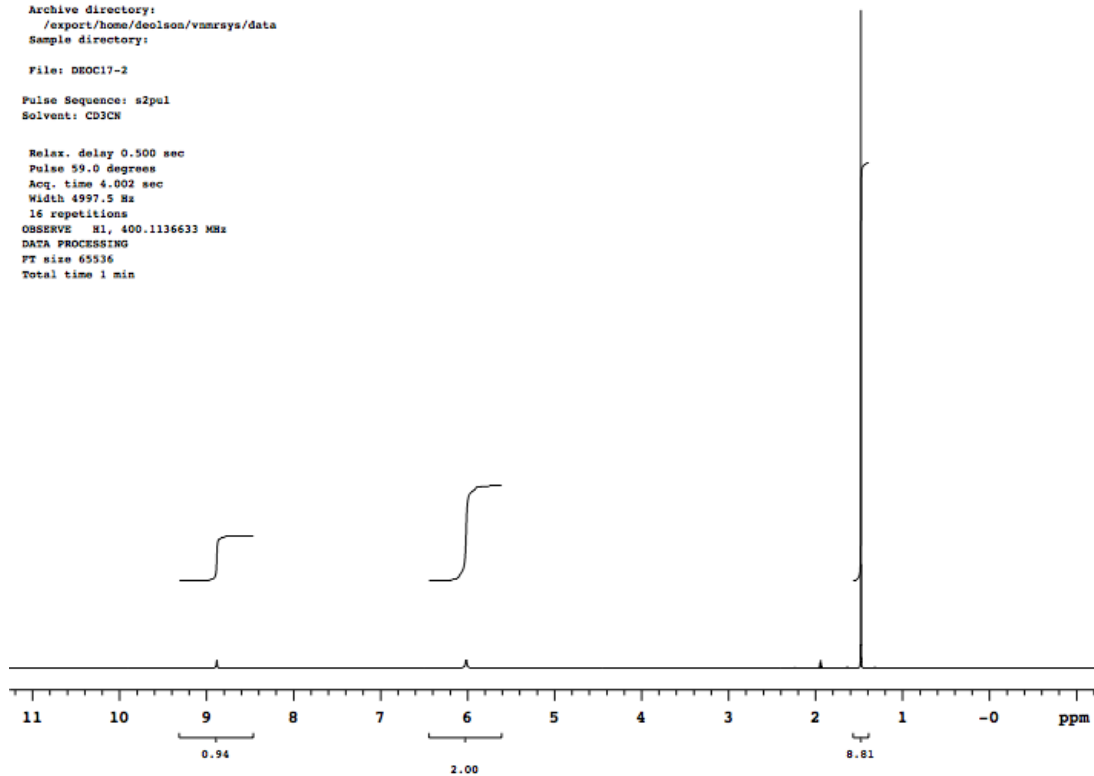

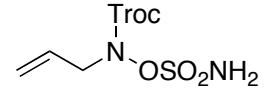

Table 1, entry 1 substrate

STANDARD IN OBSERVE

Archive directory:  
 /export/home/geolson/vmrays/data  
 Sample directory:  
 File: DQ085-3  
 Pulse Sequence: s2pul  
 Solvent: CD3CN  
 Relax. delay 0.500 sec  
 Pulse 59.0 degrees  
 Acq. time 4.002 sec  
 Width 4997.5 Hz  
 16 repetitions  
 OBSERVE H1, 400.113633 MHz  
 DATA PROCESSING  
 FT size 65536  
 Total time 1 min

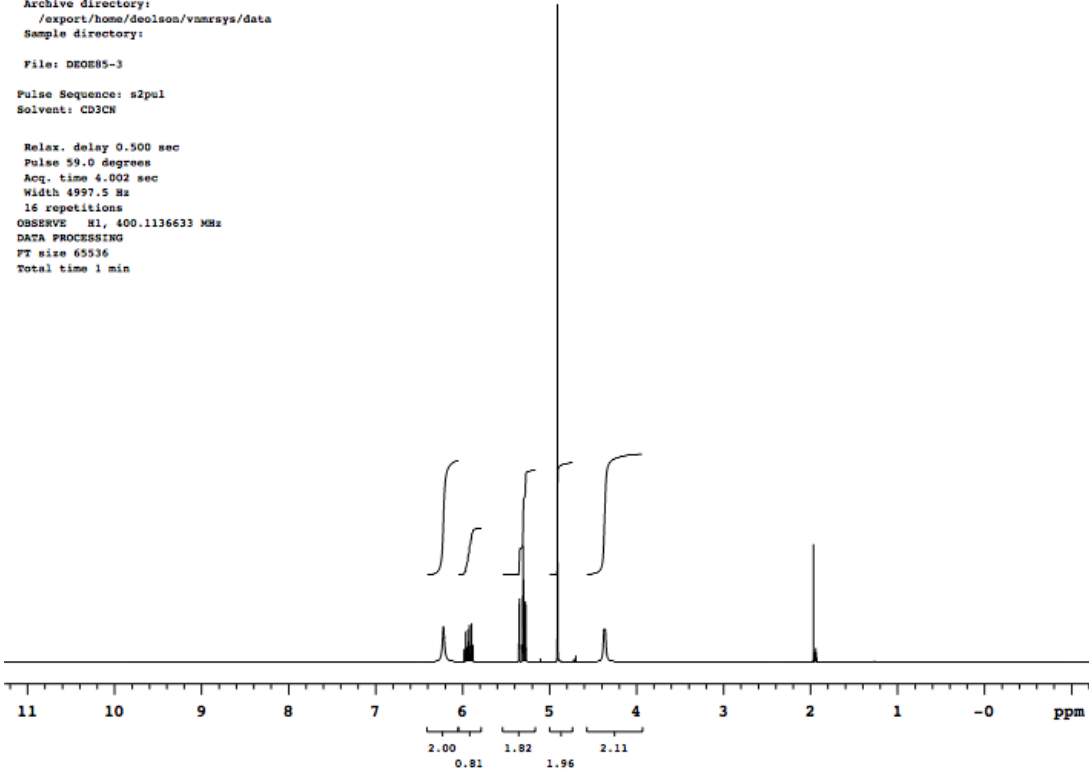

13C OBSERVE

Archive directory:  
 /export/home/geolson/vmrays/data  
 Sample directory:  
 File: DQ085-4  
 Pulse Sequence: s2pul  
 Solvent: CD3CN  
 Relax. delay 0.500 sec  
 Pulse 35.2 degrees  
 Acq. time 1.199 sec  
 Width 25000.0 Hz  
 96 repetitions  
 OBSERVE C13, 100.6085690 MHz  
 DECOUPLE H1, 400.1156728 MHz  
 Power 43 dB  
 continuously on  
 WALTZ-16 modulated  
 DATA PROCESSING  
 Line broadening 0.5 Hz  
 FT size 65536  
 Total time 29 min

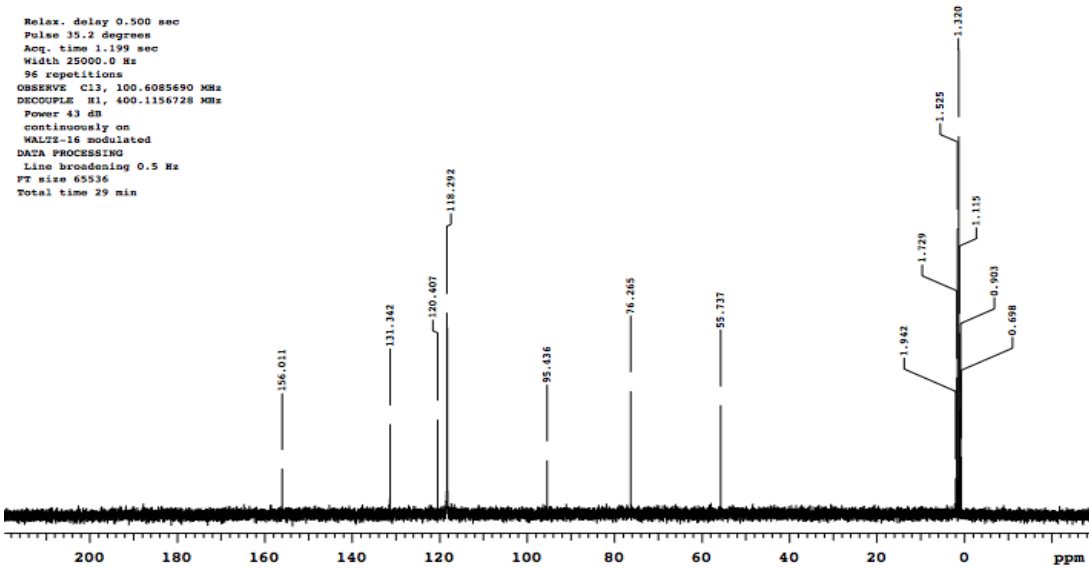

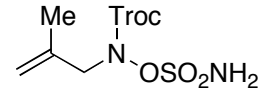

Table 1, entry 3 substrate

STANDARD IN OBSERVE

Archive directory:  
/export/home/deolson/vnmrsys/data  
Sample directory:

File: DQOE101-1

Pulse Sequence: s2pul  
Solvent: CDCl3

Relax. delay 0.500 sec  
Pulse 59.0 degrees  
Acq. time 4.002 sec  
Width 4997.5 Hz  
16 repetitions  
OBSERVE H1, 400.1115372 MHz  
DATA PROCESSING  
FT size 65536  
Total time 1 min

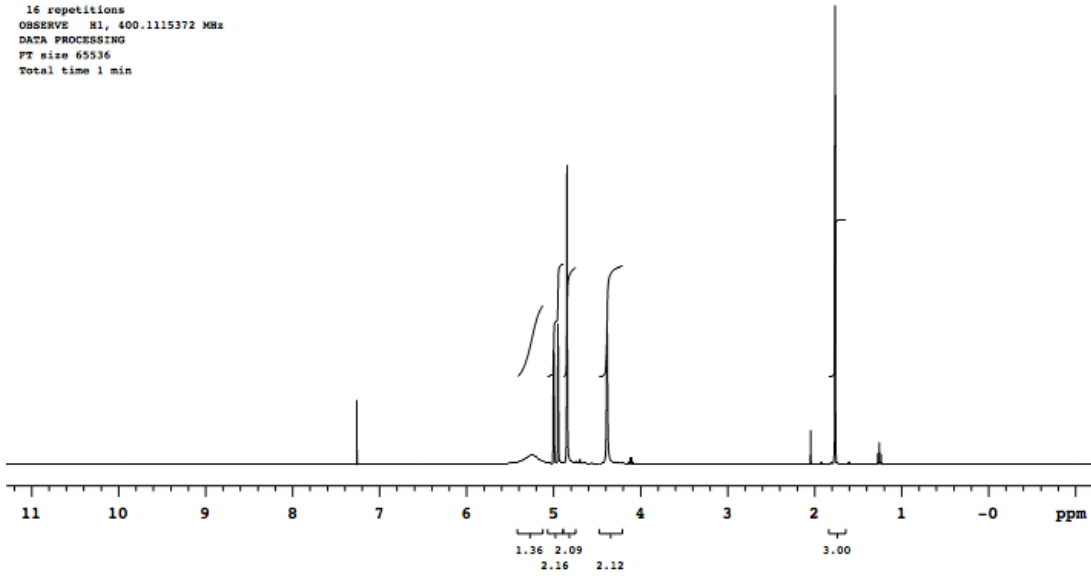

13C OBSERVE

Archive directory:  
/export/home/deolson/vnmrsys/data  
Sample directory:

File: DQOE101-2

Pulse Sequence: s2pul  
Solvent: CDCl3

Relax. delay 0.500 sec  
Pulse 35.2 degrees  
Acq. time 1.199 sec  
Width 25000.0 Hz  
128 repetitions  
OBSERVE C13, 100.6081131 MHz  
DECOUPLE H1, 400.1135562 MHz  
Power: 43 dB  
continuously on  
WALTZ-16 modulated  
DATA PROCESSING  
Line broadening 0.5 Hz  
FT size 65536  
Total time 29 min

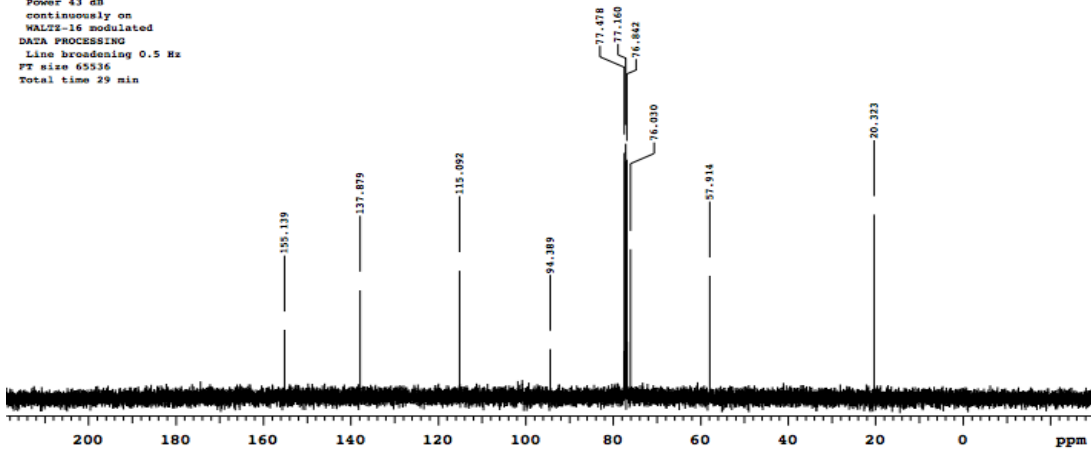

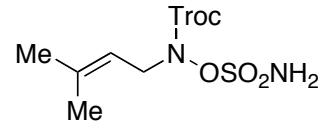

Table 1, entry 5 substrate

STANDARD IN OBSERVE

Archive directory:  
/export/home/deolson/vnmrsys/data  
Sample directory:

File: DEOE105-1

Pulse Sequence: s2pul  
Solvent: CDCl3

Relax. delay 0.500 sec  
Pulse 59.0 degrees  
Acq. time 4.002 sec  
Width 4997.5 Hz  
16 repetitions  
OBSERVE H1, 400.1115371 MHz  
DATA PROCESSING  
FT size 65536  
Total time 1 min

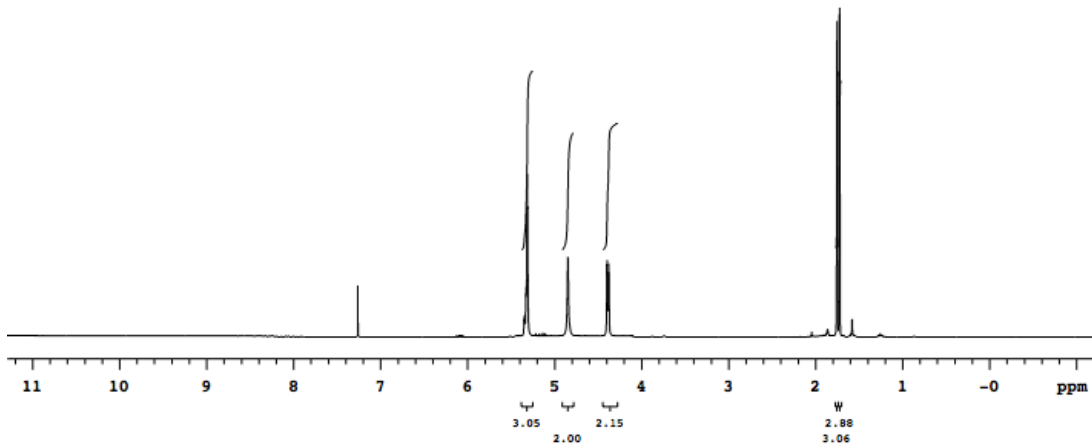

13C OBSERVE

Archive directory:  
/export/home/deolson/vnmrsys/data  
Sample directory:

File: DEOE105-2

Pulse Sequence: s2pul  
Solvent: CDCl3

Relax. delay 0.500 sec  
Pulse 35.2 degrees  
Acq. time 1.199 sec  
Width 25000.0 Hz  
128 repetitions  
OBSERVE C13, 100.6081131 MHz  
DECOUPLE H1, 400.1135562 MHz  
Power 43 dB  
continuously on  
WALTZ-16 modulated  
DATA PROCESSING  
Line broadening 0.5 Hz  
FT size 65536  
Total time 29 min

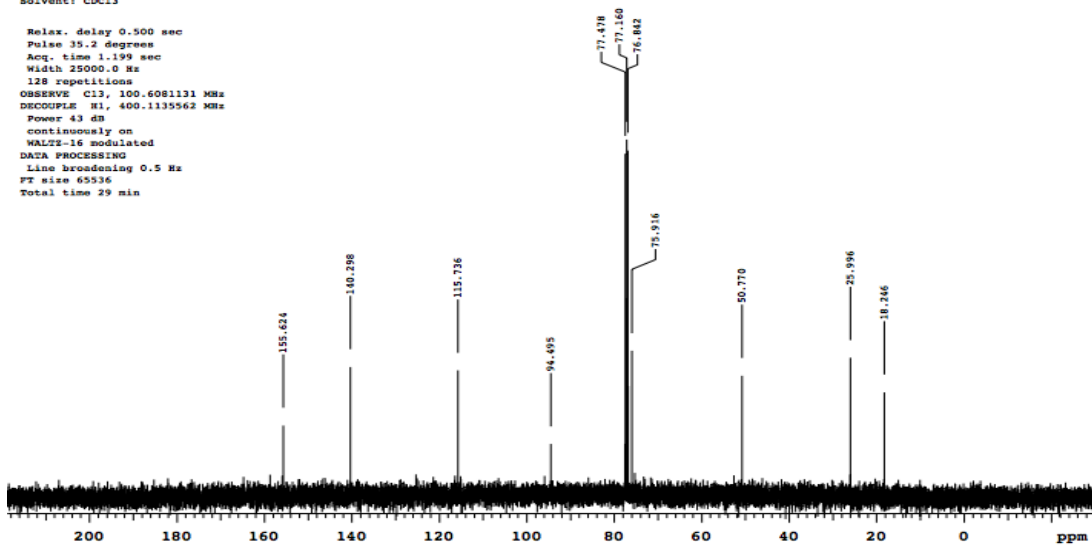

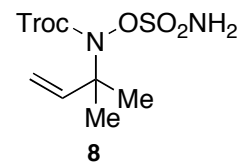

STANDARD 1H OBSERVE

Archive directory:  
/export/home/acomm/vmreyes/data  
Sample directory:

File: sm-2-128-1h

Pulse Sequence: #spul  
Solvent: CDCl<sub>3</sub>

Pulse 44.3 degree  
Acq. time 3.744 sec  
Width 4000.0 Hz  
14 repetitions  
OBSERVE F1: 299.9455043 MHz  
DATA PROCESSING  
Line broadening 0.3 Hz  
PT size 12710  
Total time 1 min

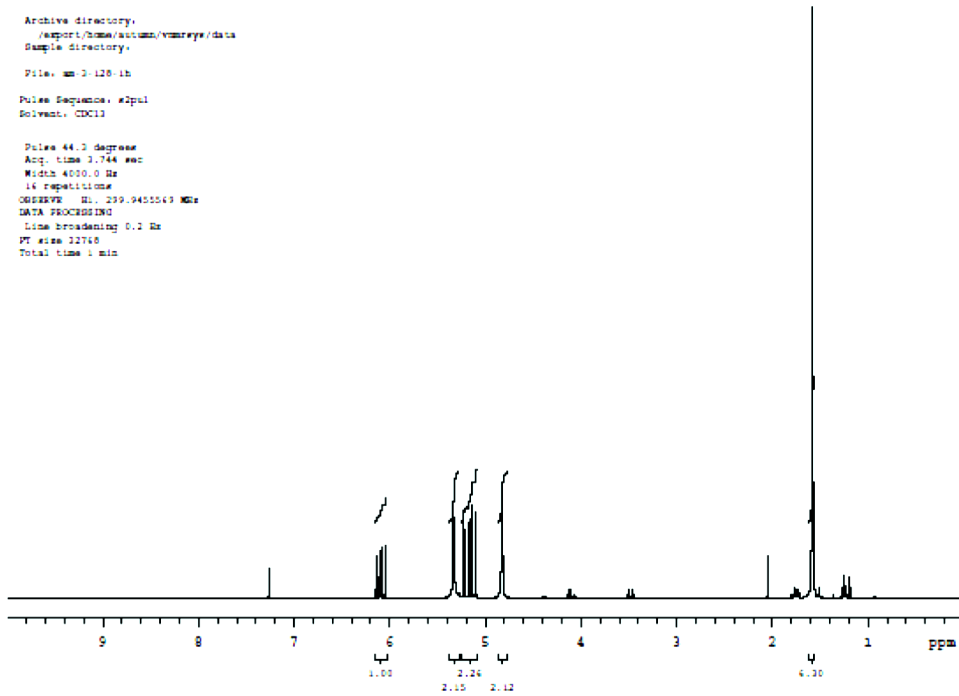

13C OBSERVE

Archive directory:  
/export/home/acomm/vmreyes/data  
Sample directory:

File: sm-2-128-13c

Pulse Sequence: #spul  
Solvent: CDCl<sub>3</sub>

Pulse 31.0 degree  
Acq. time 1.515 sec  
Width 14501.7 Hz  
154 repetitions  
OBSERVE C13: 75.4213004 MHz  
DECOUPLE H1: 299.9470487 MHz  
Power 30 dB  
continuously on  
WALTZ-16 modulated  
DATA PROCESSING  
Line broadening 1.0 Hz  
PT size 65534  
Total time 1 hr. 2 min

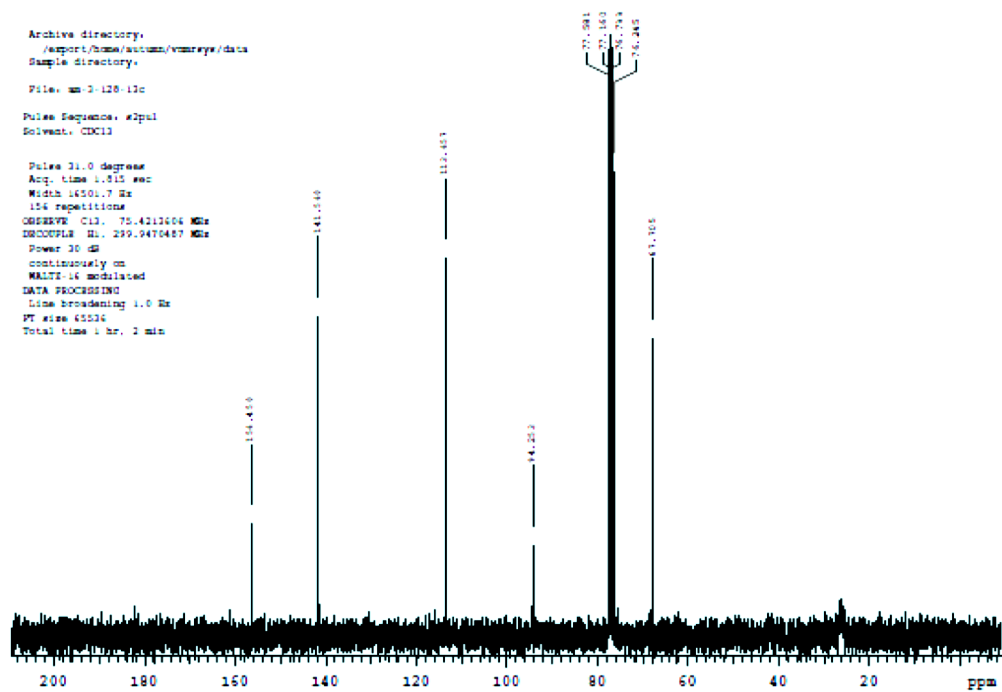

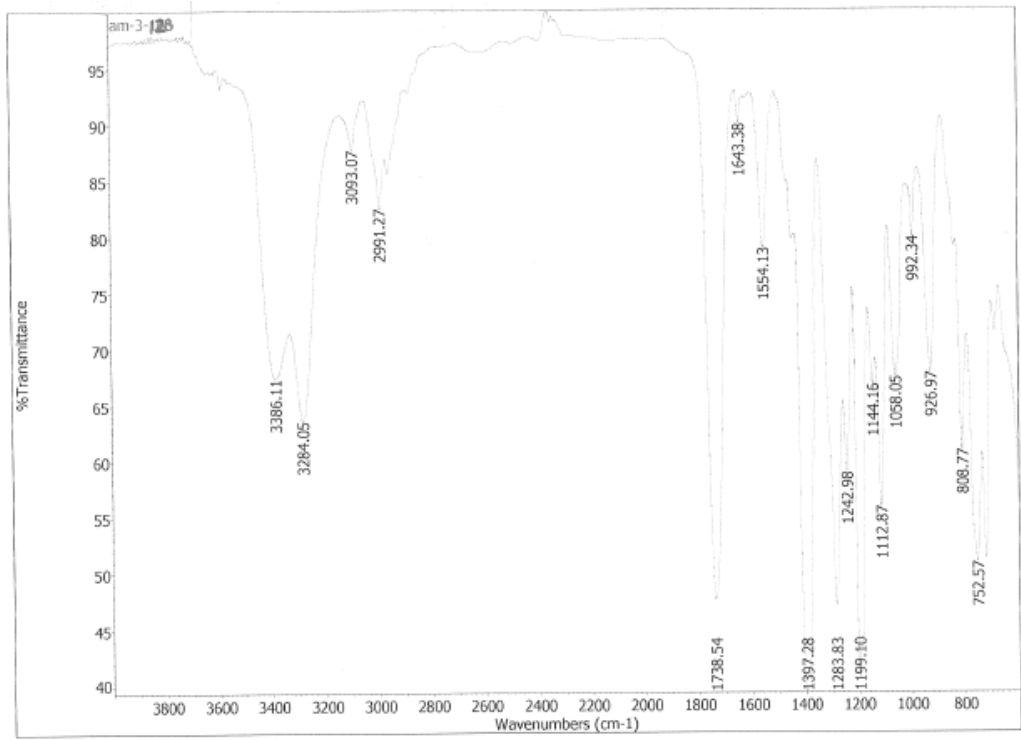



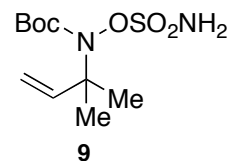

Std proton

Archive directory:

Sample directory:

File: sm-4-148-1h

Pulse Sequence: s2pul

Solvent: cdcl3

Relax. delay 0.500 sec

Pulse 45.0 degree

Acq. time 4.000 sec

Width 5605.4 Hz

16 repetitions

OBSERVE F1: 399.7291451 MHz

DATA PROCESSING

PT size 65536

Total time 1 min

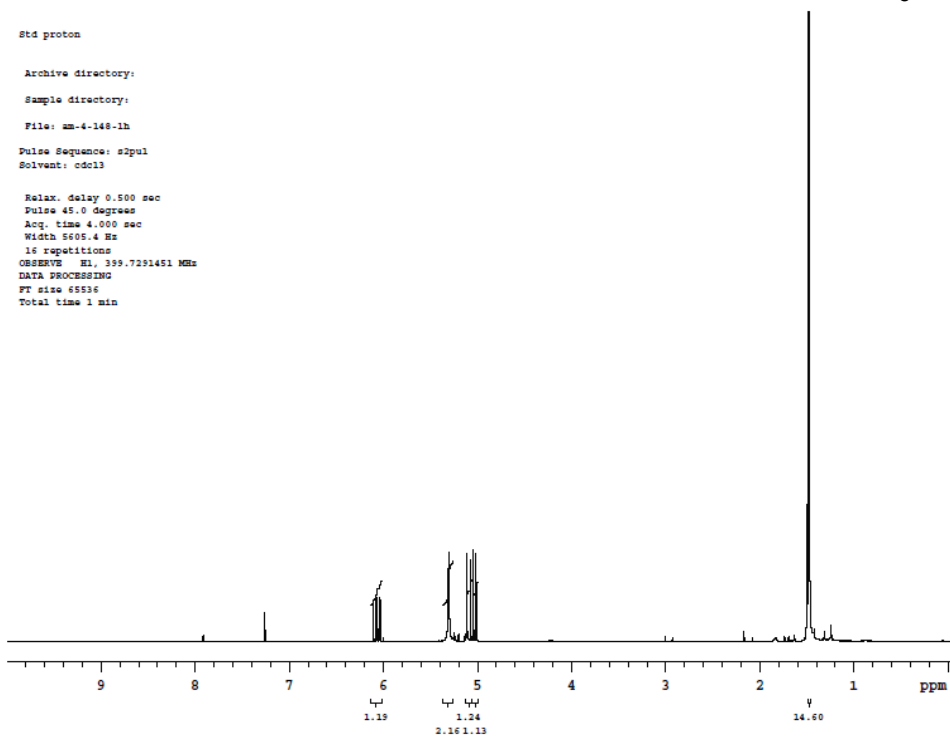

Std proton

Archive directory:

Sample directory:

File: sm-4-148-13c

Pulse Sequence: #2pul

Solvent: cdcl3

Acq. 1-14-07

Relax. delay 1.000 sec

Pulse 40.0 degree

Acq. time 1.300 sec

Width 24509.8 Hz

100 repetitions

OBSERVE C13: 100.5119407 MHz

INOCOPPLA H1: 399.7311429 MHz

Power 43 dB

continuously on

MULTI-16 modulated

DATA PROCESSING

Line broadening 0.5 Hz

PT size 65536

Total time 19 min

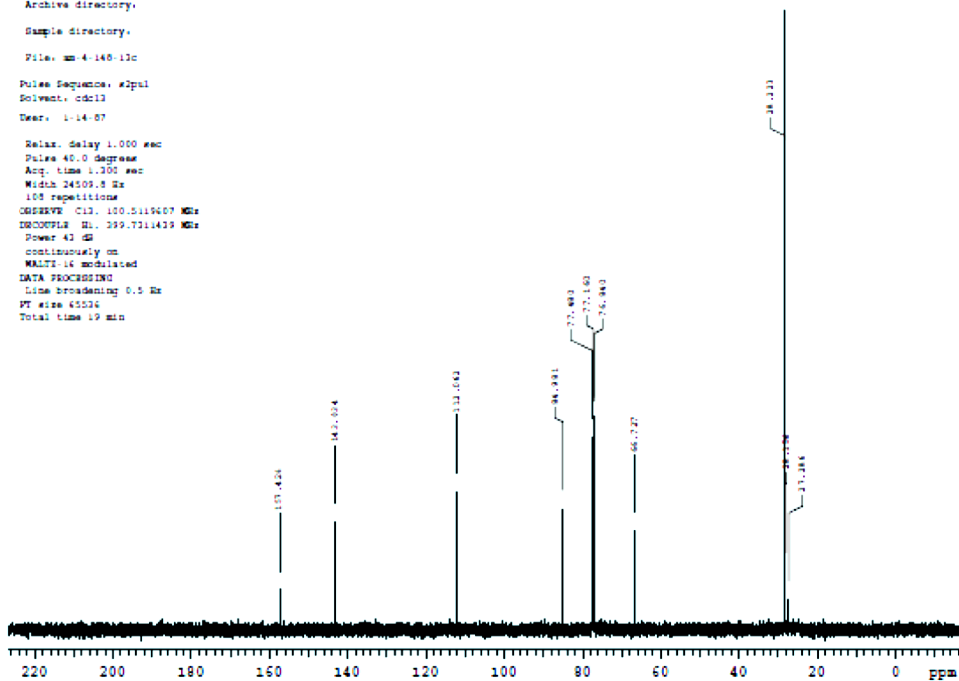

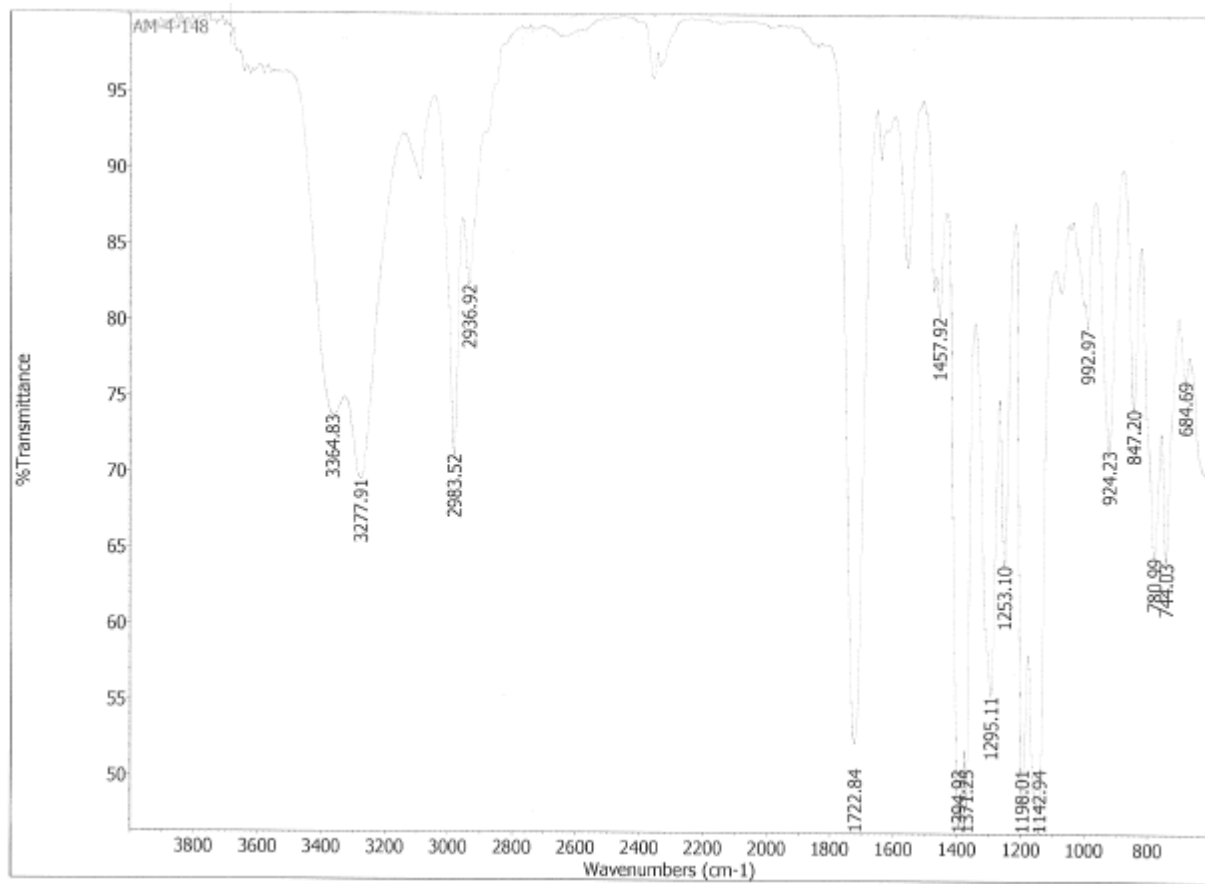

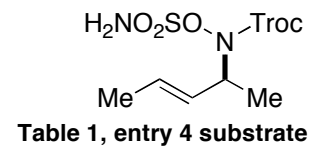

STANDARD 1H OBSERVE

Archive directory:  
/export/home/autumn/vnmrsys/data  
Sample directory:

File: am-3-108-1h-cdcl3

Pulse Sequence: s2pul  
Solvent: CDCl3

Pulse 44.3 degrees  
Acq. time 3.744 sec  
Width 4000.0 Hz  
16 repetitions  
OBSERVE H1. 299.945569 MHz  
DATA PROCESSING  
Line broadening 0.2 Hz  
FT size 32768  
Total time 1 min

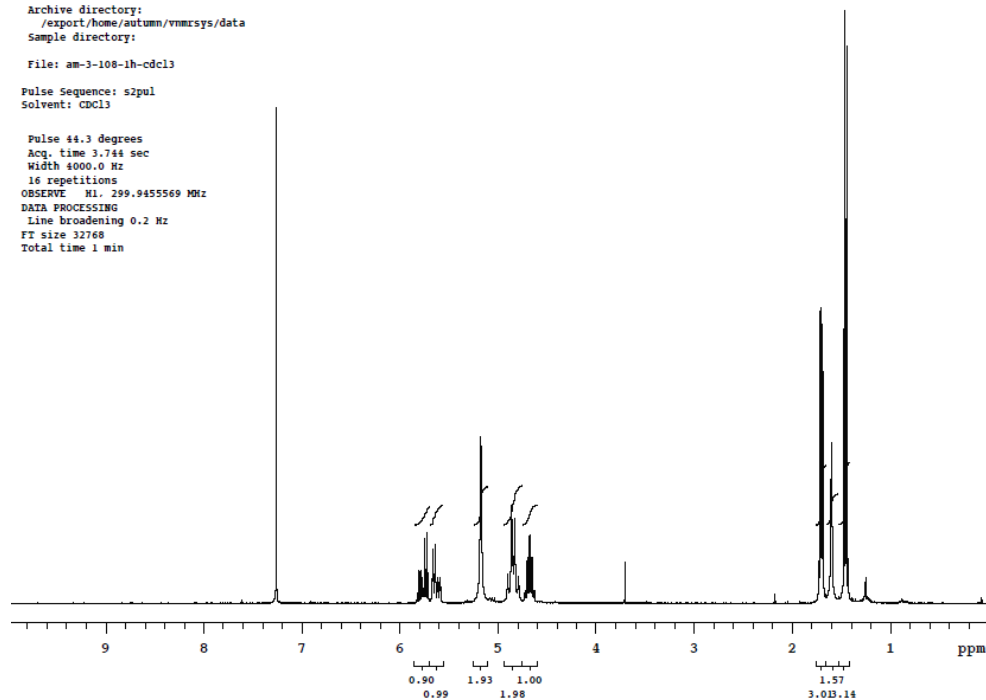

13C OBSERVE

Archive directory:  
/export/home/autumn/vnmrsys/data  
Sample directory:

File: am-3-108-13c-cdcl3

Pulse Sequence: s2pul  
Solvent: CDCl3

Pulse 31.0 degrees  
Acq. time 1.815 sec  
Width 16501.7 Hz  
636 repetitions  
OBSERVE C13. 75.4213590 MHz  
DECOUPLE H1. 299.9470487 MHz  
Power 30 dB  
continuously on  
WALTZ-16 modulated  
DATA PROCESSING  
Line broadening 1.0 Hz  
FT size 65536  
Total time 1 hr. 2 min

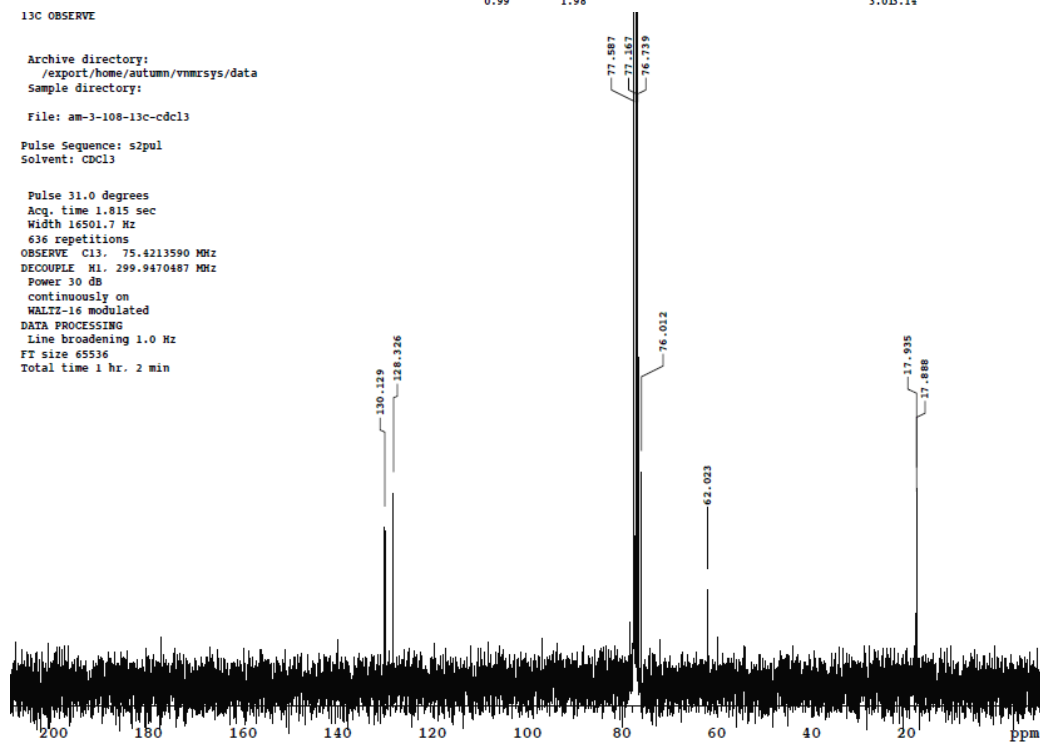

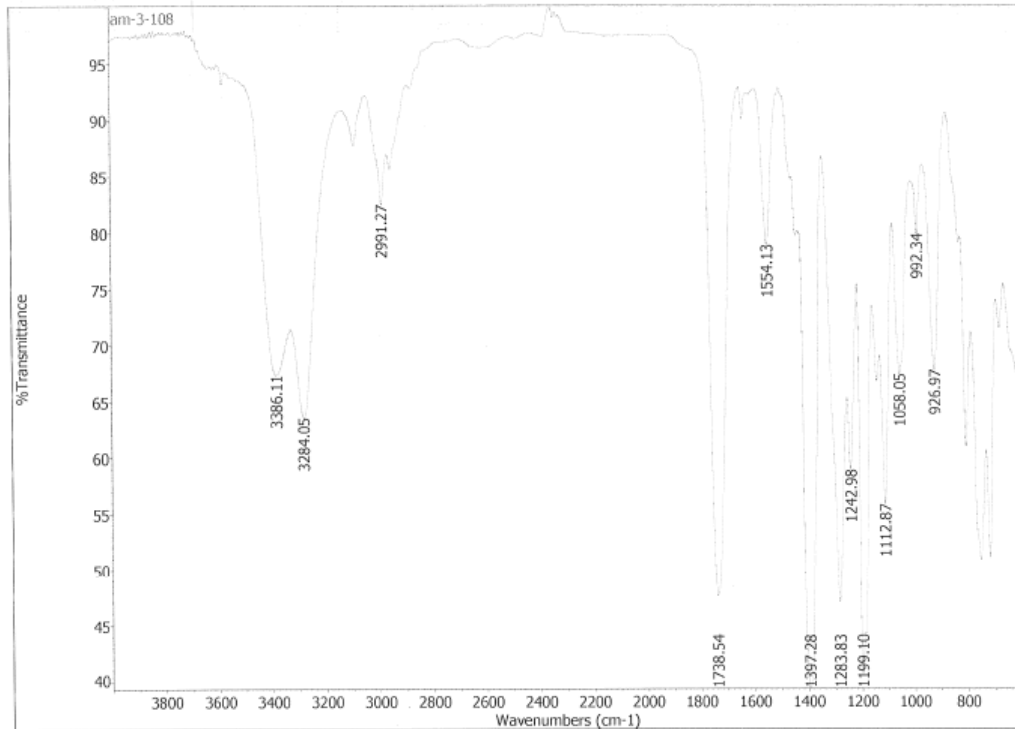

**Stanford University Chemistry Department  
Trost Lab HPLC Report**

Data File: c:\star\data\autumn\am-3-108-oi-90.10-  
 Injection Date: 11/26/2008 02:19:59  
 Injection Method: c:\star\data\dauid\chiral right method  
 Run Time (min): 24.562  
 Instrument (Inj): Chiral LC Right

**Sample Prep Info**  
Manual injection

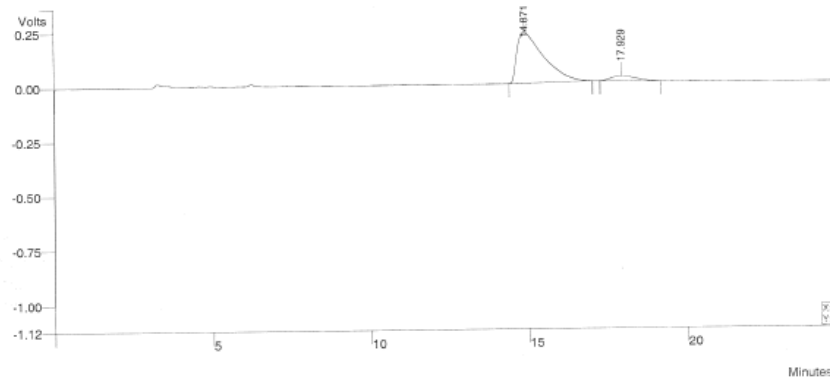

| Peak No | Ret. Time (min) | Peak Area       | Width 1/2 (sec) | Percent Area  |
|---------|-----------------|-----------------|-----------------|---------------|
| 1       | 14.871          | 13577906        | 63.1            | 92.29         |
| 2       | 17.929          | 1134630         | 45.9            | 7.71          |
|         |                 | <b>14712536</b> |                 | <b>100.00</b> |

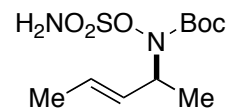

Table 1, entry 4 substrate

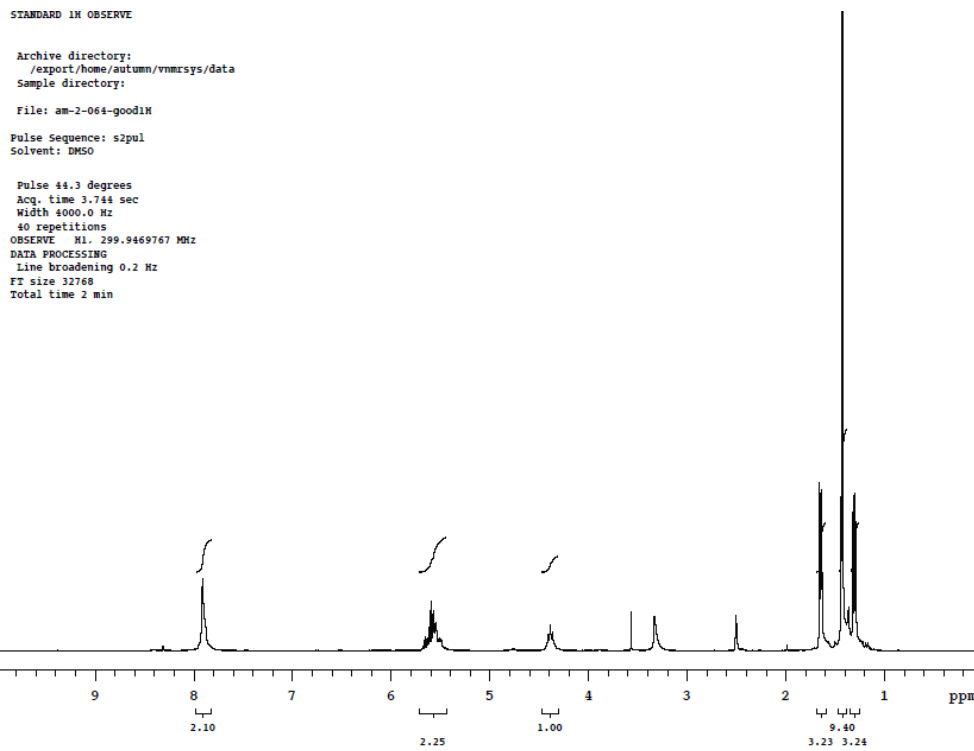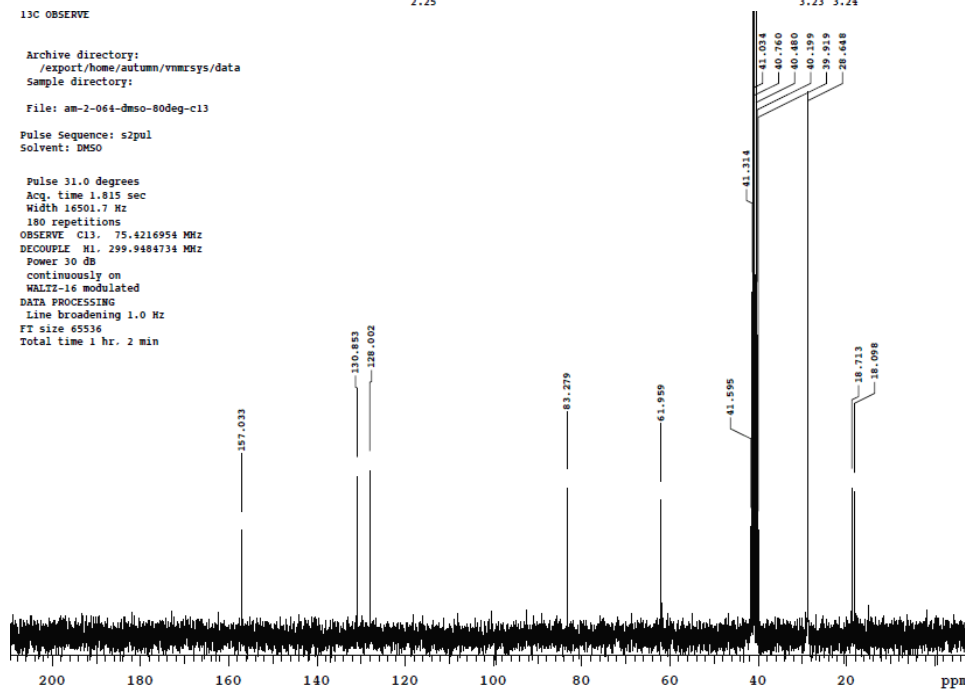

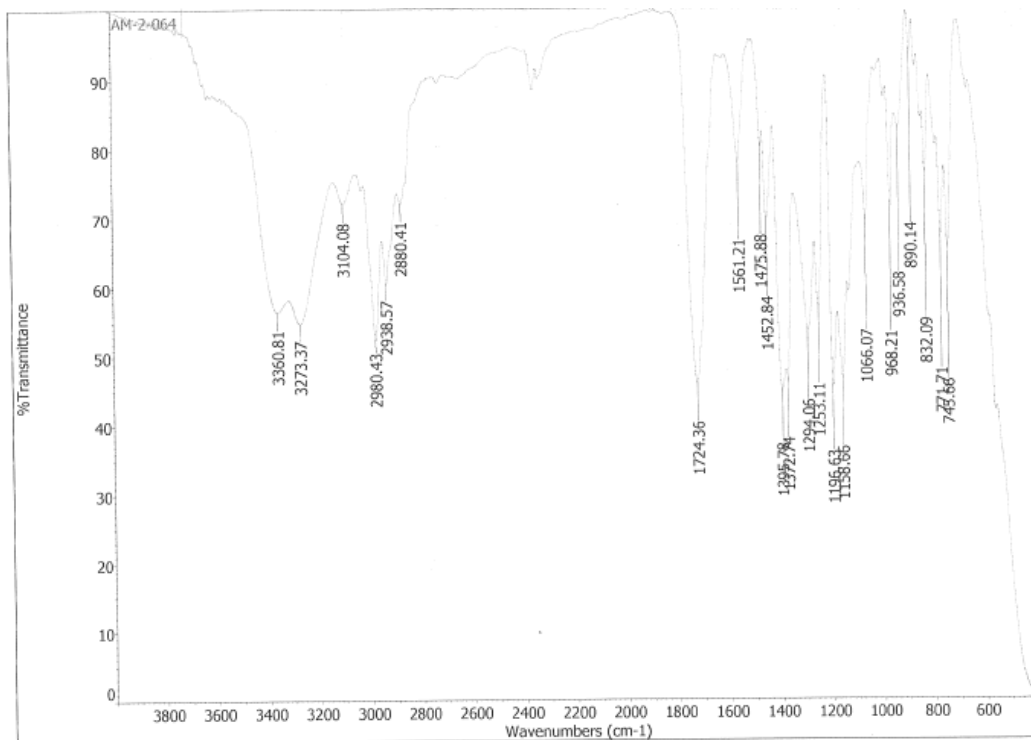

**Stanford University Chemistry Department  
Trost Lab HPLC Report**

Data File: c:\star\data\autumn\am-2-64-oi-95-5-9  
 Injection Date: 07/28/2008 06:27:10  
 Injection Method: c:\star\data\dauid\chiral right method  
 Run Time (min): 30.377  
 Instrument (Inj): Chiral LC Right

Sample Prep Info  
 Manual injection

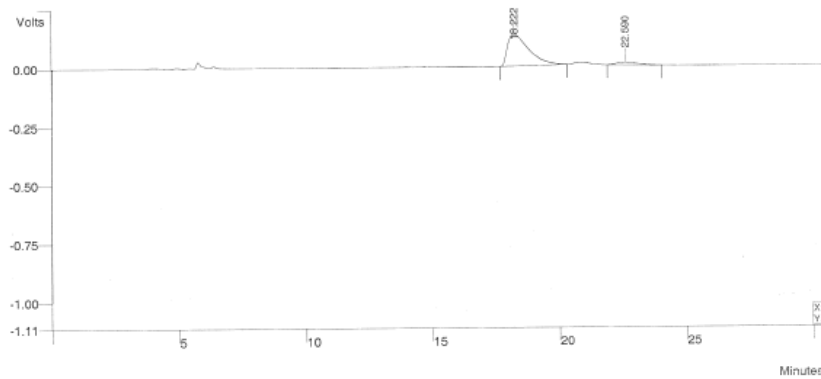

| Peak No | Ret. Time (min) | Peak Area      | Width 1/2 (sec) | Percent Area  |
|---------|-----------------|----------------|-----------------|---------------|
| 1       | 18.222          | 7653673        | 64.0            | 93.03         |
| 2       | 22.590          | 573245         | 46.4            | 6.97          |
|         |                 | <b>8226918</b> |                 | <b>100.00</b> |

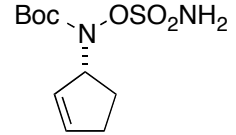

Table 1, entry 6 substrate

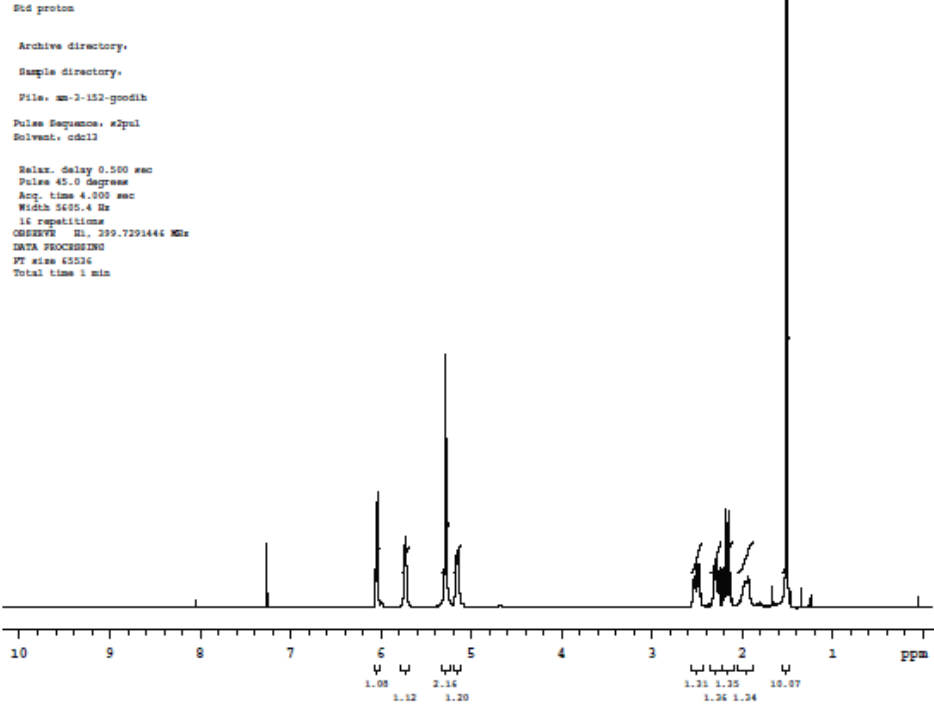

13C OBSERVE

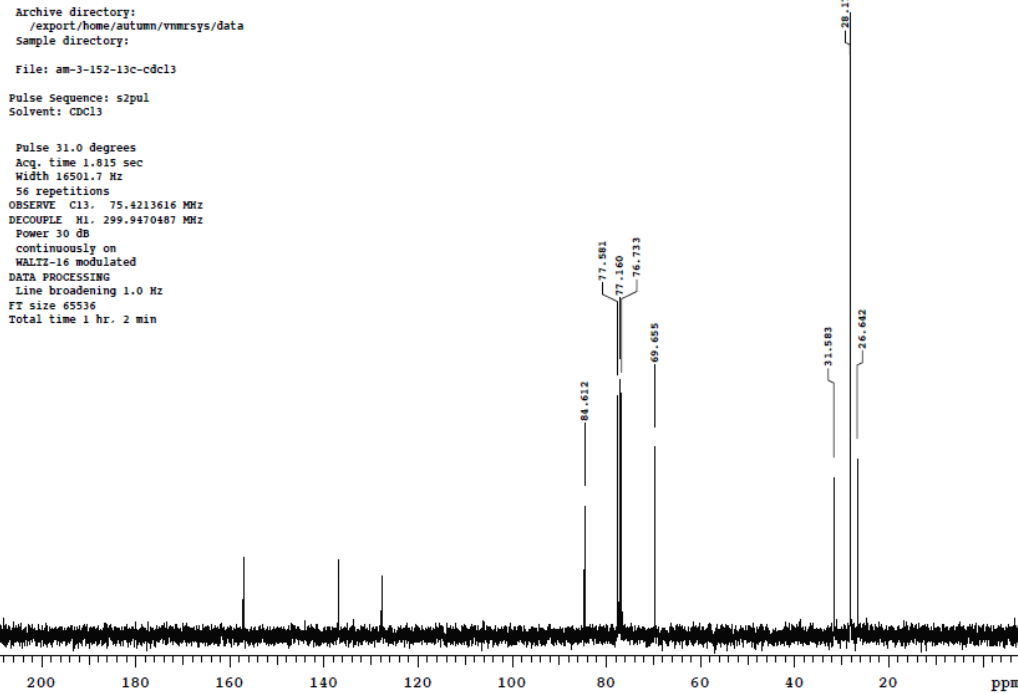

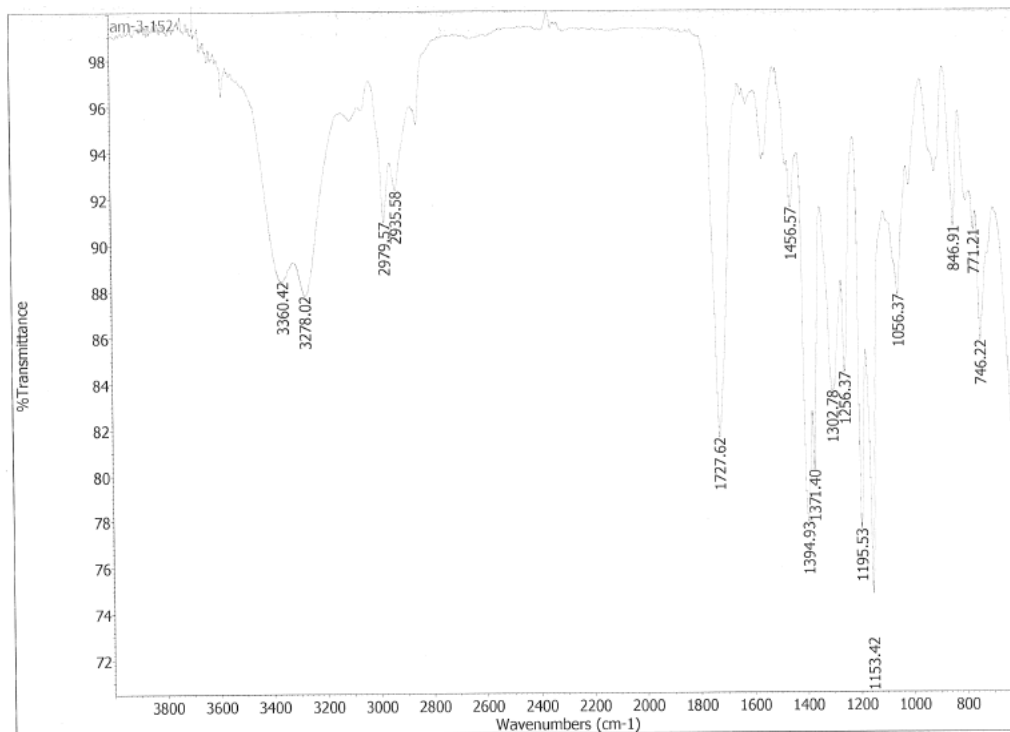

**Stanford University Chemistry Department  
Trost Lab HPLC Report**

Data File: c:\star\data\autumn\am-3-152b-ad-90.1  
Injection Date: 12/08/2008 07:26:30  
Injection Method: c:\star\data\dauid\chiral right method  
Run Time (min): 22.758  
Instrument (Inj): Chiral LC Right

Sample Prep Info  
Manual injection

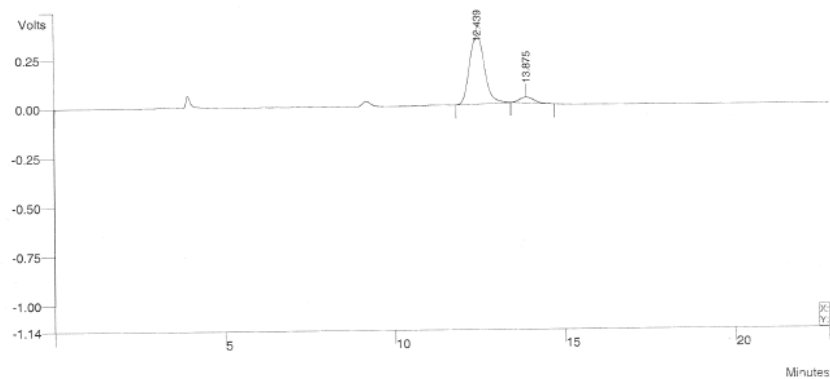

| Peak No | Ret. Time (min) | Peak Area       | Width 1/2 (sec) | Percent Area  |
|---------|-----------------|-----------------|-----------------|---------------|
| 1       | 12.439          | 10715629        | 29.3            | 92.76         |
| 2       | 13.875          | 835919          | 24.2            | 7.24          |
|         |                 | <b>11551548</b> |                 | <b>100.00</b> |



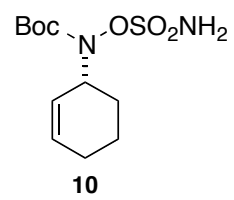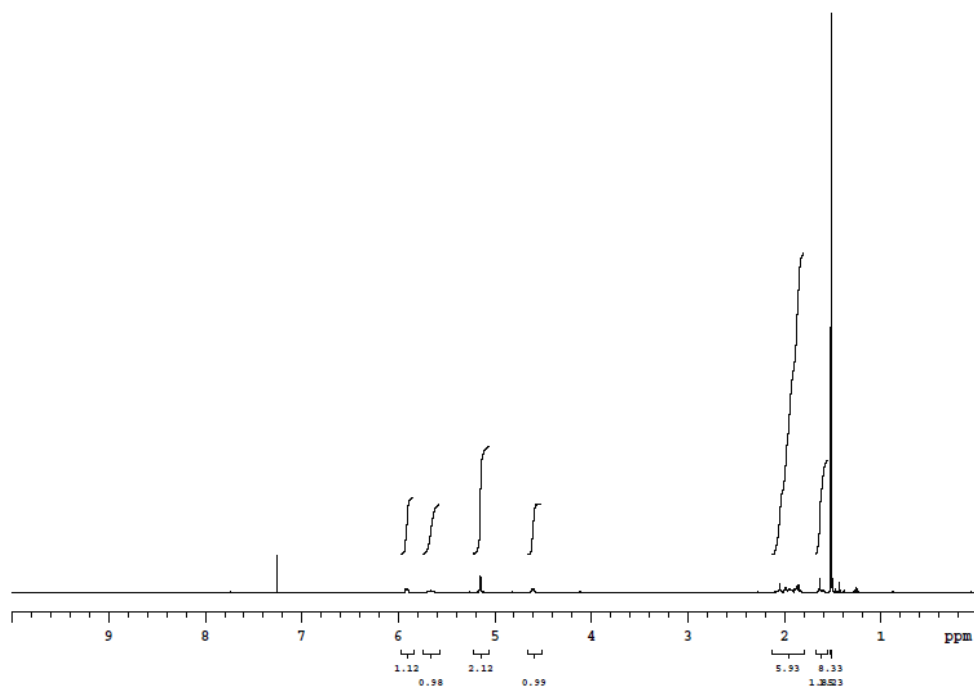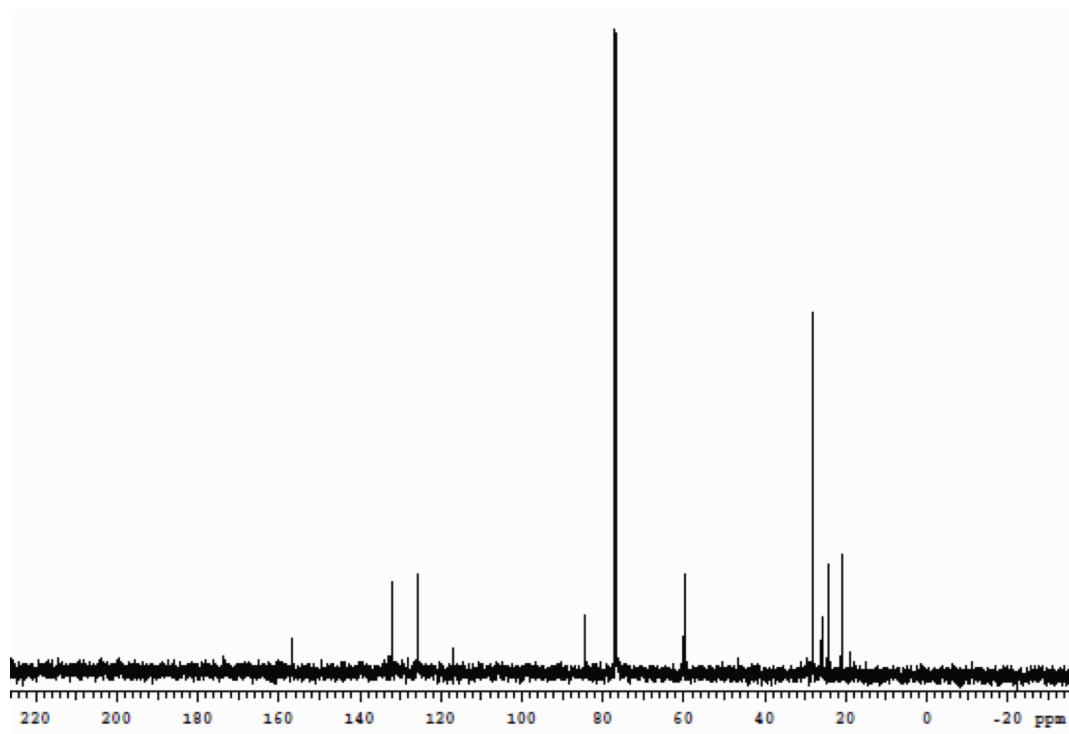

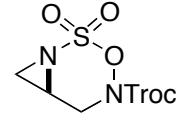

Table 1, entry 1 product

STANDARD 1H OBSERVE

Archive directory:  
 /export/home/deolson/vnmrsys/data  
 Sample directory:  
 File: DEOE145-1  
 Pulse Sequence: s2pul  
 Solvent: CD3CN

Relax. delay 0.500 sec  
 Pulse 59.0 degrees  
 Acq. time 4.002 sec  
 Width 4997.5 Hz  
 12 repetitions  
 OBSERVE H1, 400.1136637 MHz  
 DATA PROCESSING  
 FT size 65536  
 Total time 1 min

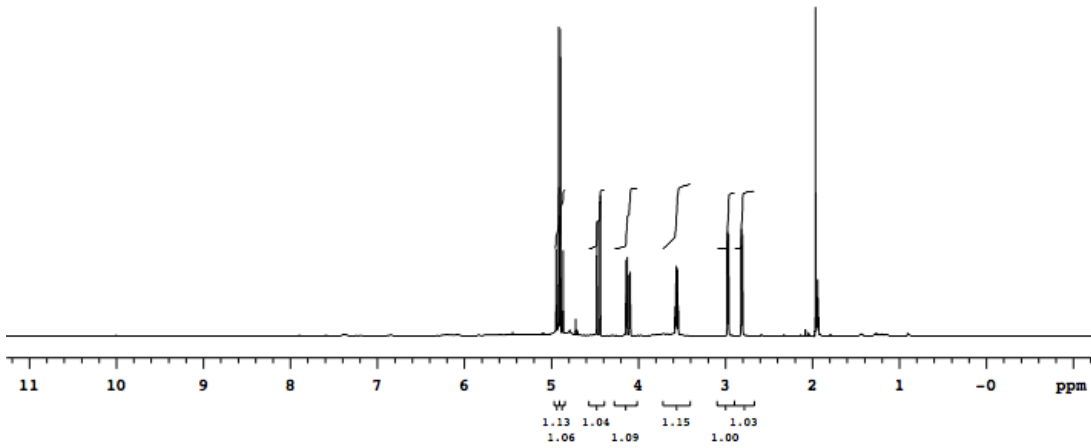

<sup>13</sup>C OBSERVE

Archive directory:  
 /export/home/deolson/vnmrsys/data  
 Sample directory:  
 File: DEOE99-2  
 Pulse Sequence: s2pul  
 Solvent: CD3CN

Relax. delay 0.500 sec  
 Pulse 35.2 degrees  
 Acq. time 1.199 sec  
 Width 25000.0 Hz  
 384 repetitions  
 OBSERVE C13, 100.6085637 MHz  
 DECOUPLE H1, 400.1156728 MHz  
 Power 43 dB  
 continuously on  
 WALTZ-16 modulated  
 DATA PROCESSING  
 Line broadening 0.5 Hz  
 FT size 65536  
 Total time 29 min

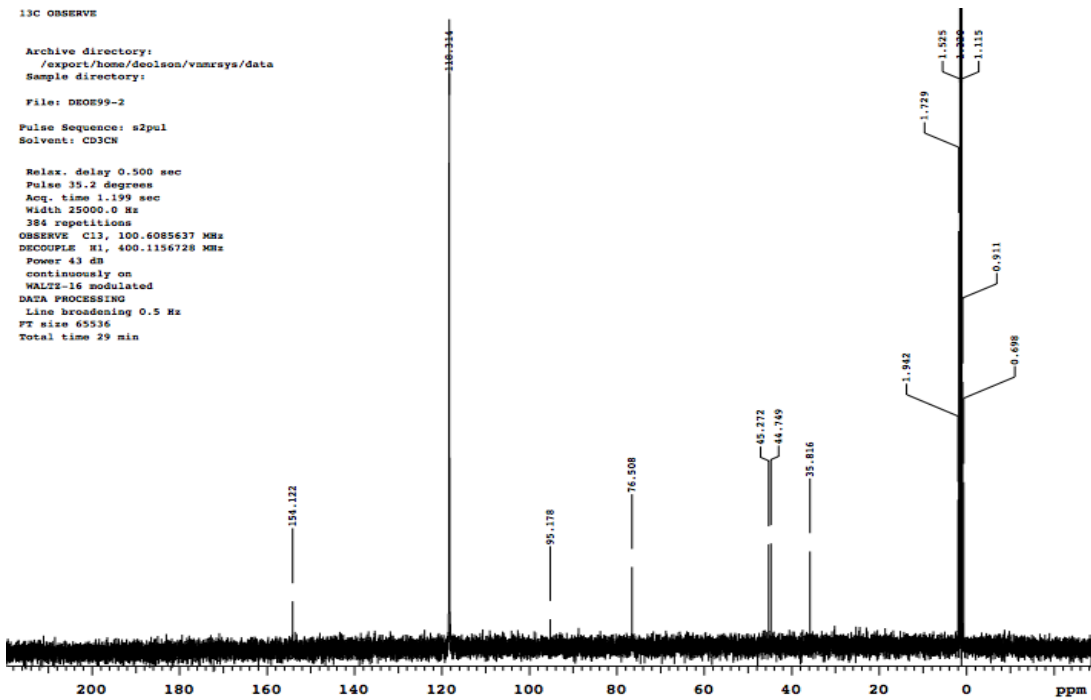

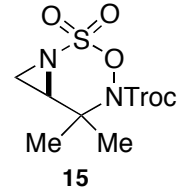

STANDARD IN OBSERVE

Archive directory:  
/export/home/geolson/vmrsys/data  
Sample directory:

File: DEOE135-2

Pulse Sequence: s2pul  
Solvent: CDCl3

Relax. delay 0.500 sec  
Pulse 59.0 degrees  
Acq. time 4.002 sec  
Width 4997.5 Hz  
16 repetitions  
OBSERVE H1, 400.1115375 MHz  
DATA PROCESSING  
FT size 65536  
Total time 1 min

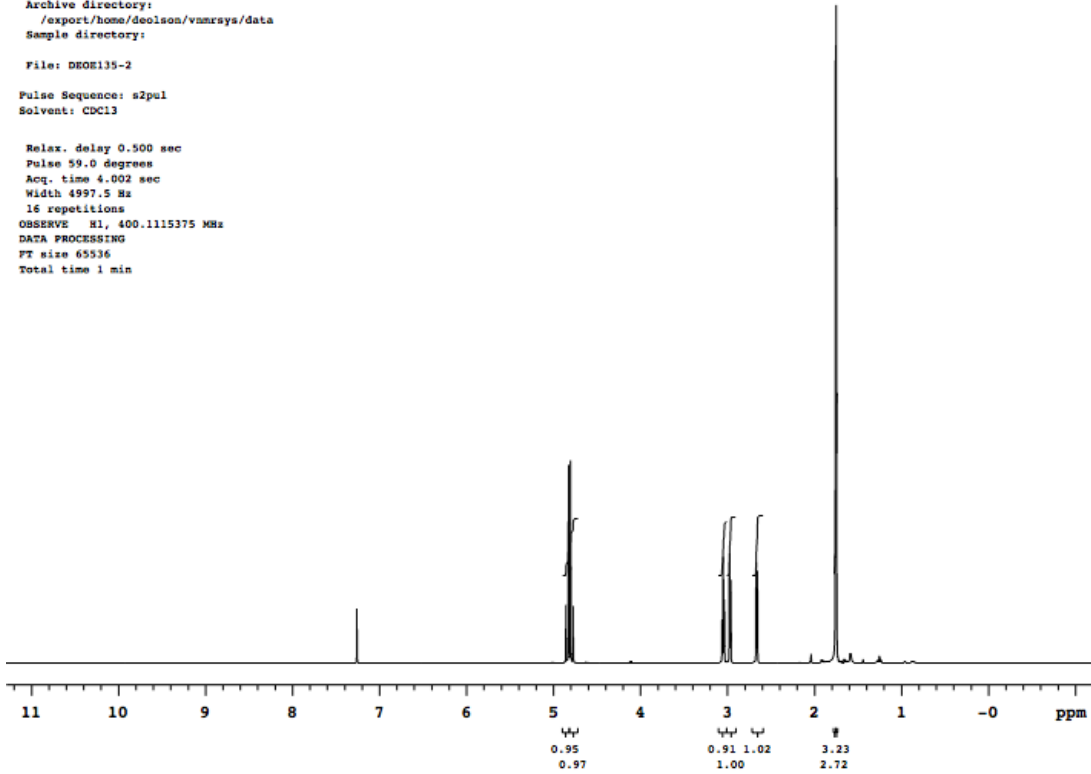

13C OBSERVE

Archive directory:  
/export/home/geolson/vmrsys/data  
Sample directory:

File: DEOE135-3

Pulse Sequence: s2pul  
Solvent: CDCl3

Relax. delay 0.500 sec  
Pulse 35.2 degrees  
Acq. time 1.199 sec  
Width 25000.0 Hz  
256 repetitions  
OBSERVE C13, 100.6081131 MHz  
DECOUPLE H1, 400.1135562 MHz  
Power 43 dB  
continuously on  
WALTZ-16 modulated  
DATA PROCESSING  
Line broadening 0.5 Hz  
FT size 65536  
Total time 29 min

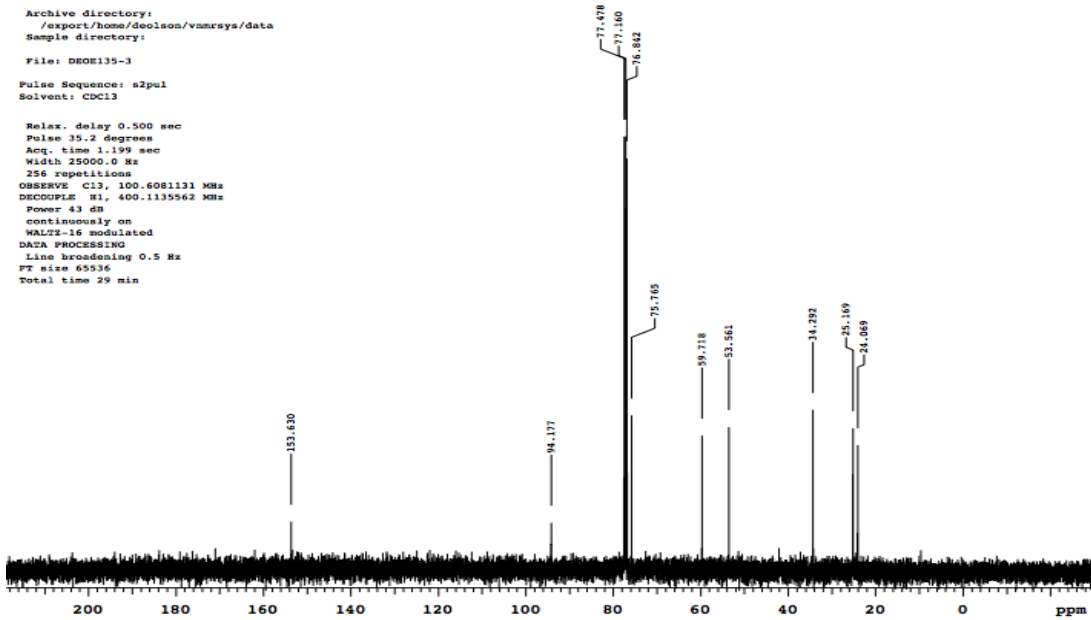

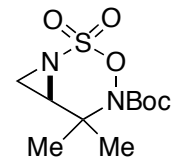

Table 1, entry 2 product

STANDARD IN OBSERVE

Archive directory:  
/export/home/deolson/vmrrsys/data  
Sample directory:

File: DEOD283-2

Pulse Sequence: s2pul  
Solvent: CDCl3

Relax. delay 0.500 sec  
Pulse 59.0 degrees  
Acq. time 4.002 sec  
Width 4997.5 Hz  
16 repetitions  
OBSERVE H1, 400.1115369 MHz  
DATA PROCESSING  
FT size 65536  
Total time 1 min

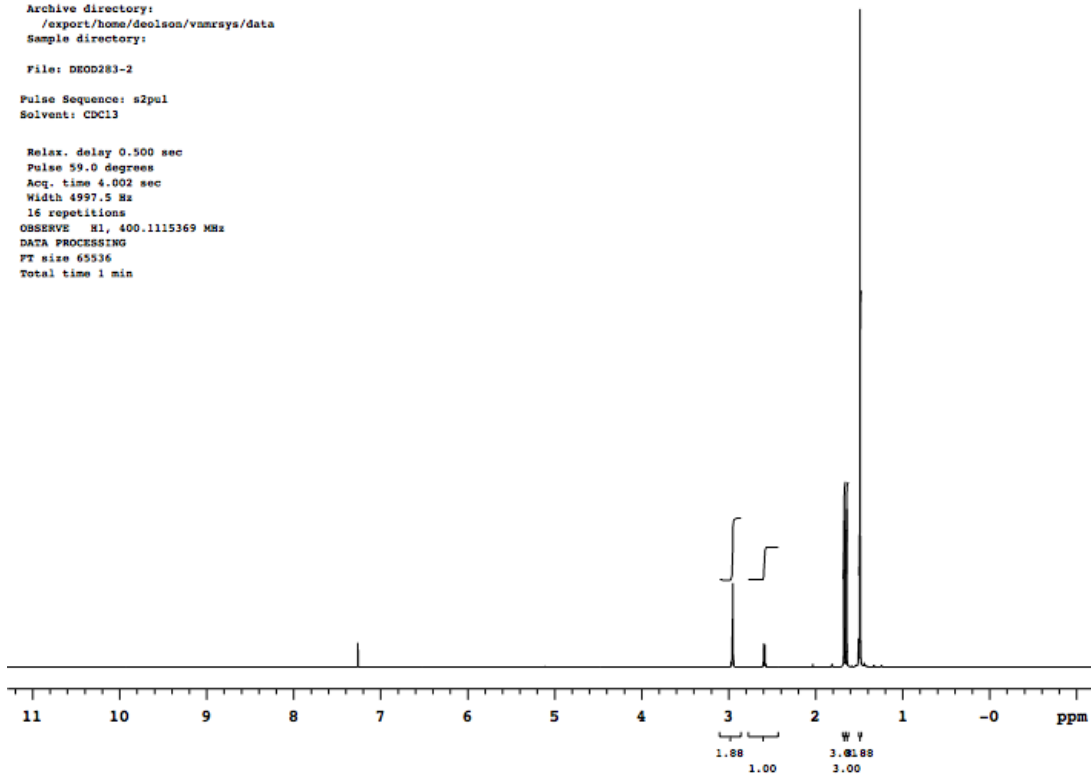

13C OBSERVE

Archive directory:  
/export/home/deolson/vmrrsys/data  
Sample directory:

File: DEOD283-3

Pulse Sequence: s2pul  
Solvent: CDCl3

Relax. delay 0.500 sec  
Pulse 35.2 degrees  
Acq. time 1.199 sec  
Width 25000.0 Hz  
192 repetitions  
OBSERVE C13, 100.6081139 MHz  
DECOUPLE H1, 400.1135562 MHz  
Power 43 dB  
continuously on  
WALTZ-16 modulated  
DATA PROCESSING  
Line broadening 0.5 Hz  
FT size 65536  
Total time 29 min

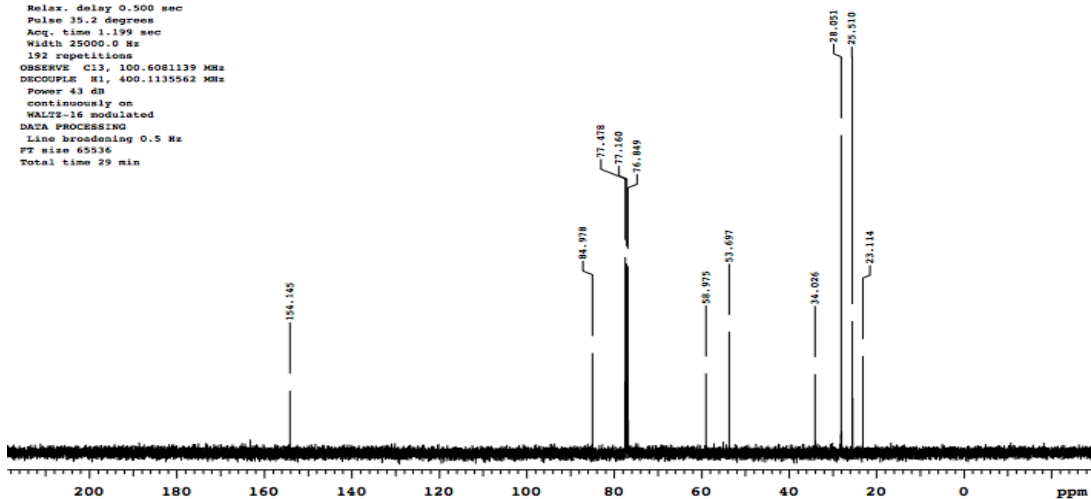

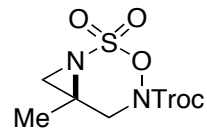

Table 1, entry 3 product

STANDARD 1H OBSERVE

Archive directory:  
/export/home/deolson/vnmrsys/data  
Sample directory:

File: DEOE107-2

Pulse Sequence: s2pul  
Solvent: CDCl3

Relax. delay 0.500 sec  
Pulse 59.0 degrees  
Acq. time 4.002 sec  
Width 4997.5 Hz  
16 repetitions  
OBSERVE H1, 400.1115372 MHz  
DATA PROCESSING  
FT size 65536  
Total time 1 min

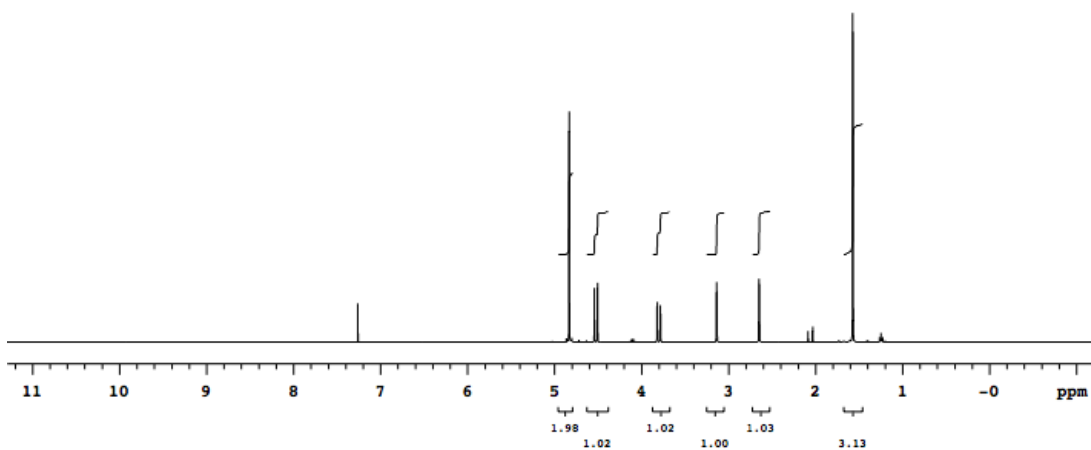

13C OBSERVE

Archive directory:  
/export/home/deolson/vnmrsys/data  
Sample directory:

File: DEOE107-3

Pulse Sequence: s2pul  
Solvent: CDCl3

Relax. delay 0.500 sec  
Pulse 35.2 degrees  
Acq. time 1.199 sec  
Width 25000.0 Hz  
112 repetitions  
OBSERVE C13, 100.6081162 MHz  
DECOUPLE H1, 400.1135562 MHz  
Power 43 dB  
continuously on  
WALTZ-16 modulated  
DATA PROCESSING  
Line broadening 0.5 Hz  
FT size 65536  
Total time 29 min

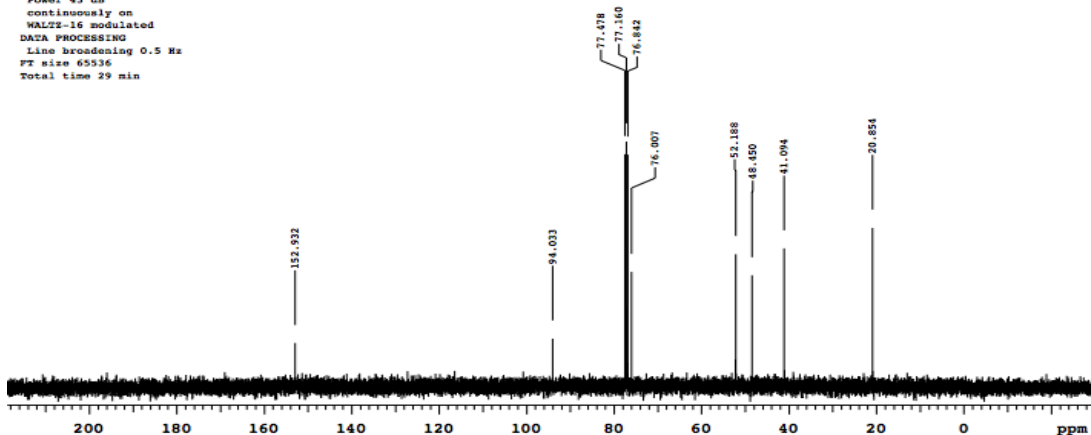

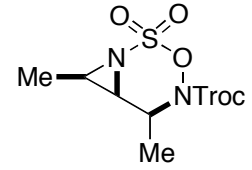

Table 1, entry 4 product (major diastereomer)

STANDARD IN OBSERVE

Archive directory:  
/export/home/deolson/vnmrsws/data  
Sample directory:

File: DEOE131-1

Pulse Sequence: s2pul  
Solvent: CDCl3

Relax. delay 0.500 sec  
Pulse 59.0 degrees  
Acq. time 4.002 sec  
Width 4997.5 Hz  
64 repetitions  
OBSERVE H1, 400.115375 MHz  
DATA PROCESSING  
FT size 65536  
Total time 4 min

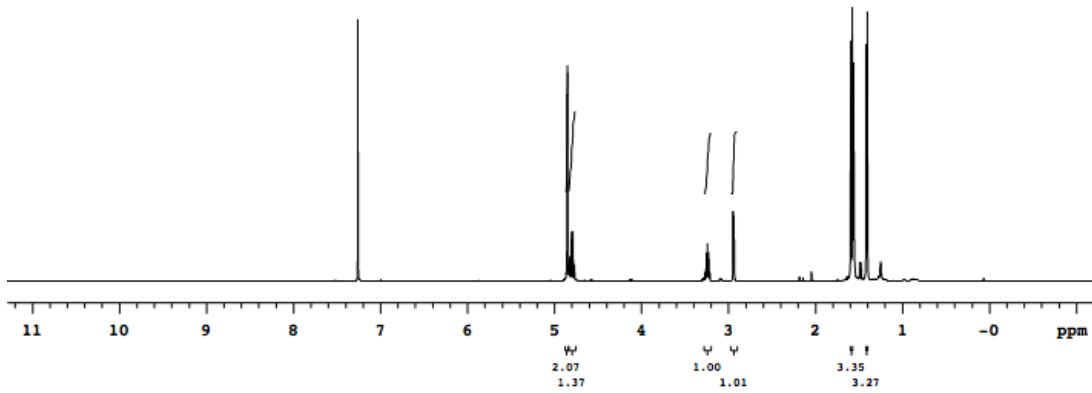

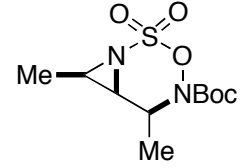

Table 1, entry 4 product (major diastereomer)

STANDARD IN OBSERVE

Archive directory:  
/export/home/deolson/vnmrsvs/data  
Sample directory:

File: DEOE125-2

Pulse Sequence: s2pul  
Solvent: CDCl3

Relax. delay 0.500 sec  
Pulse 59.0 degrees  
Acq. time 4.002 sec  
Width 4997.5 Hz  
16 repetitions  
OBSERVE H1, 400.1115371 MHz  
DATA PROCESSING  
FT size 65536  
Total time 1 min

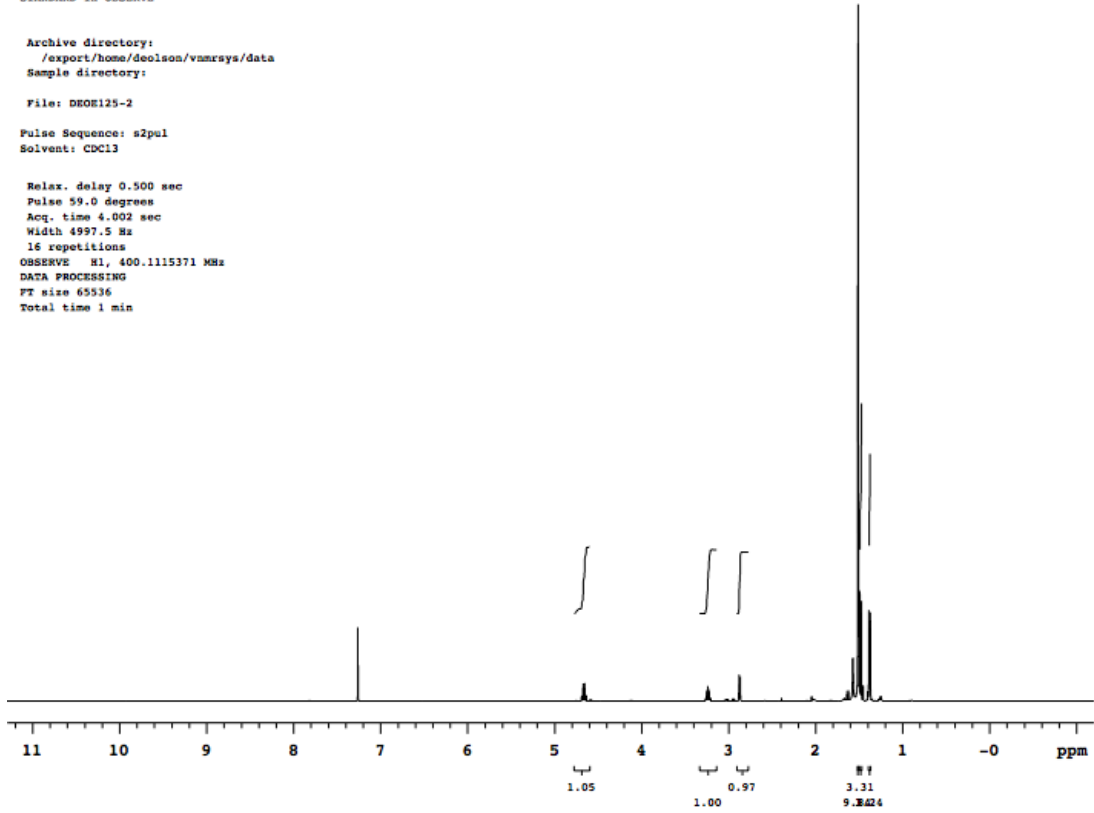

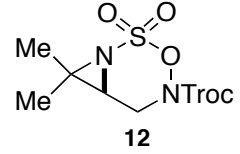

STANDARD IN OBSERVE

Archive directory:  
 /export/home/deolson/vmrsys/data  
 Sample directory:  
 File: DEOE109-2  
 Pulse Sequence: s2pul  
 Solvent: CDCl3

Relax. delay 0.500 sec  
 Pulse 59.0 degrees  
 Acq. time 4.002 sec  
 Width 4997.5 Hz  
 16 repetitions  
 OBSERVE H1, 400.115374 MHz  
 DATA PROCESSING  
 FT size 65536  
 Total time 1 min

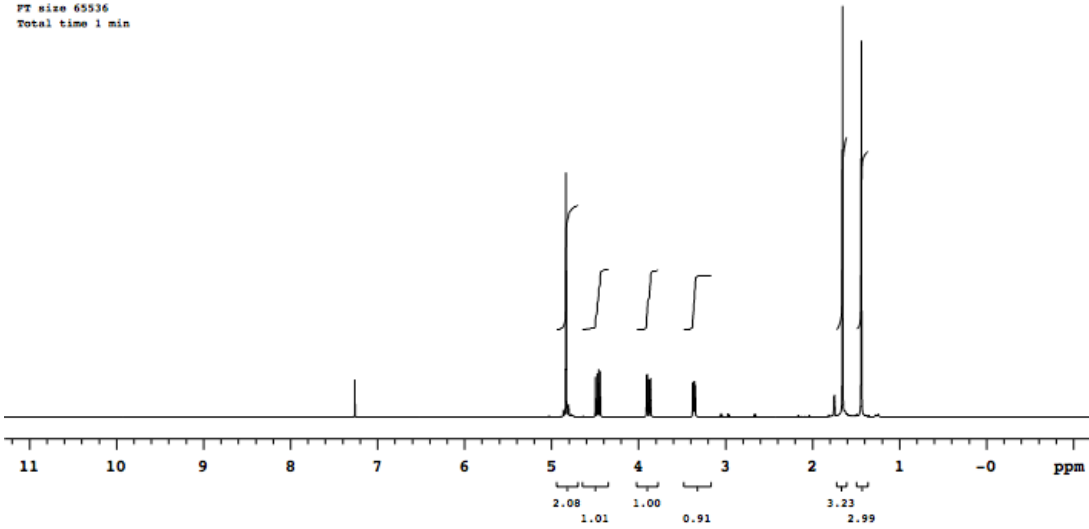

13C OBSERVE

Archive directory:  
 /export/home/deolson/vmrsys/data  
 Sample directory:  
 File: DEOE109-3  
 Pulse Sequence: s2pul  
 Solvent: CDCl3

Relax. delay 0.500 sec  
 Pulse 35.2 degrees  
 Acq. time 1.199 sec  
 Width 25000.0 Hz  
 150 repetitions  
 OBSERVE C13, 100.6081459 MHz  
 DECOUPLE H1, 400.115562 MHz  
 Power 43 dB  
 continuously on  
 WALTZ-16 modulated  
 DATA PROCESSING  
 Line broadening 0.5 Hz  
 FT size 65536  
 Total time 29 min

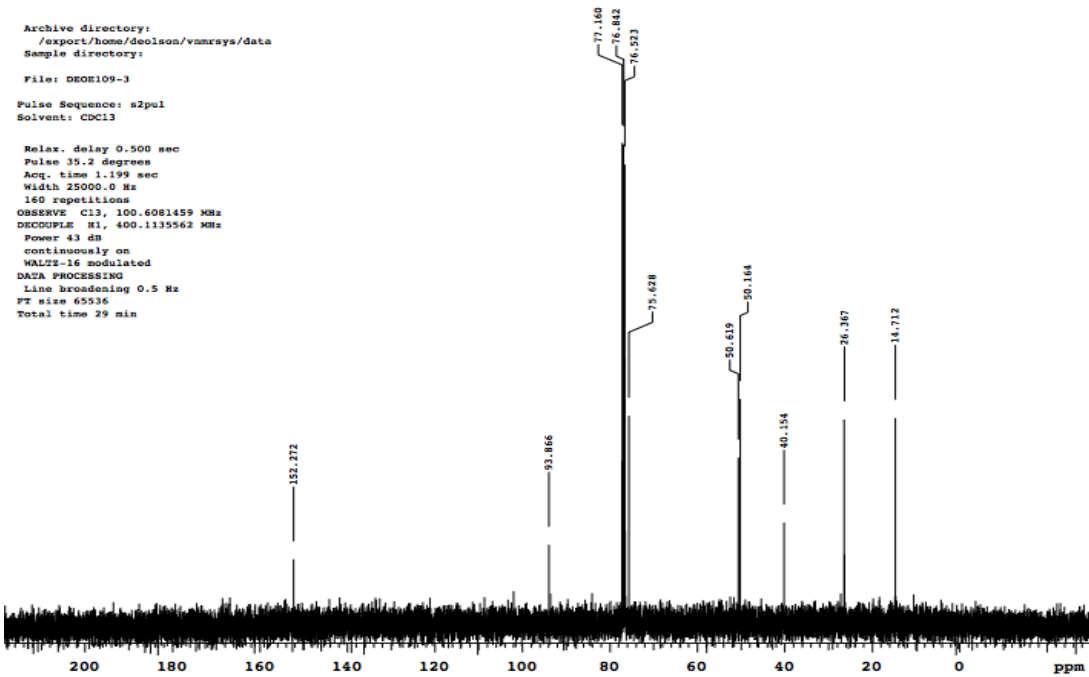



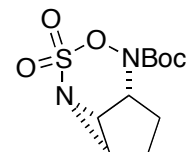

Table 1, entry 6 product

STANDARD IN OBSERVE

Archive directory:  
/export/home/deolson/vmrsys/data  
Sample directory:

File: DEOE119-1

Pulse Sequence: s2pul  
Solvent: CDCl3

Relax. delay 0.500 sec  
Pulse 59.0 degrees  
Acq. time 4.002 sec  
Width 4997.5 Hz  
16 repetitions  
OBSERVE H1, 400.1115368 MHz  
DATA PROCESSING  
FT size 65536  
Total time 1 min

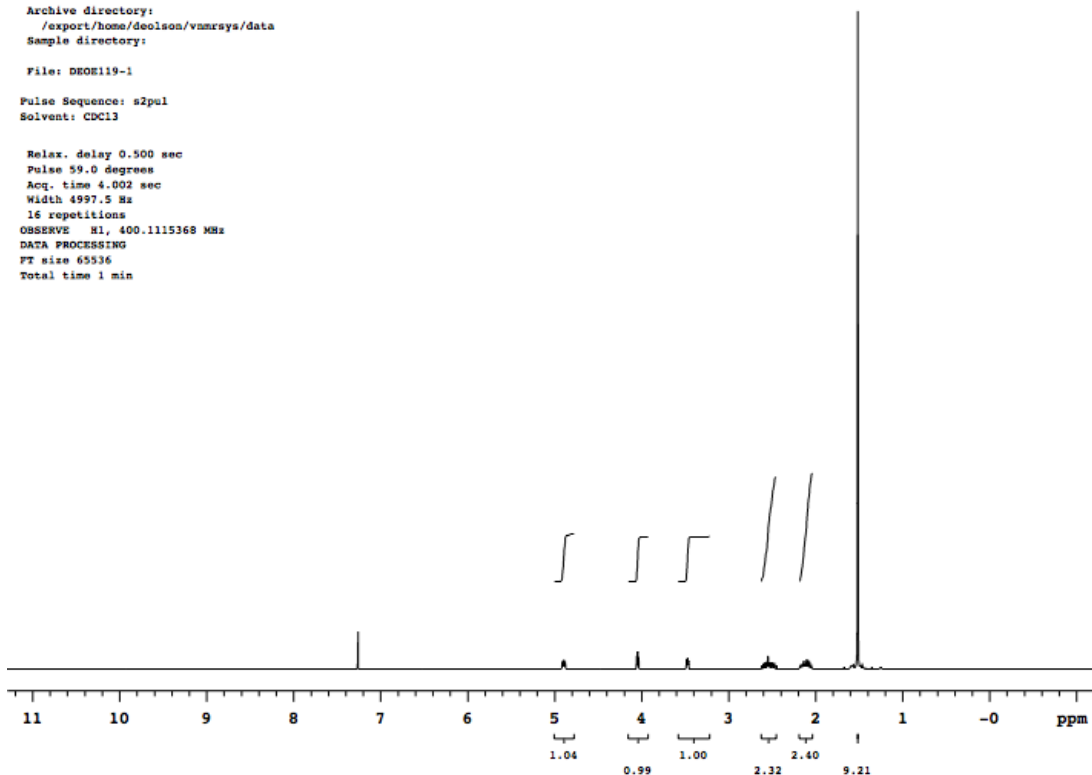

13C OBSERVE

Archive directory:  
/export/home/deolson/vmrsys/data  
Sample directory:

File: DEOE119-2

Pulse Sequence: s2pul  
Solvent: CDCl3

Relax. delay 0.500 sec  
Pulse 35.2 degrees  
Acq. time 1.199 sec  
Width 25000.0 Hz  
512 repetitions  
OBSERVE C13, 100.6081123 MHz  
DECOUPLE H1, 400.1135562 MHz  
Power 43 dB  
continuously on  
WALTZ-16 modulated  
DATA PROCESSING  
Line broadening 0.5 Hz  
FT size 65536  
Total time 29 min

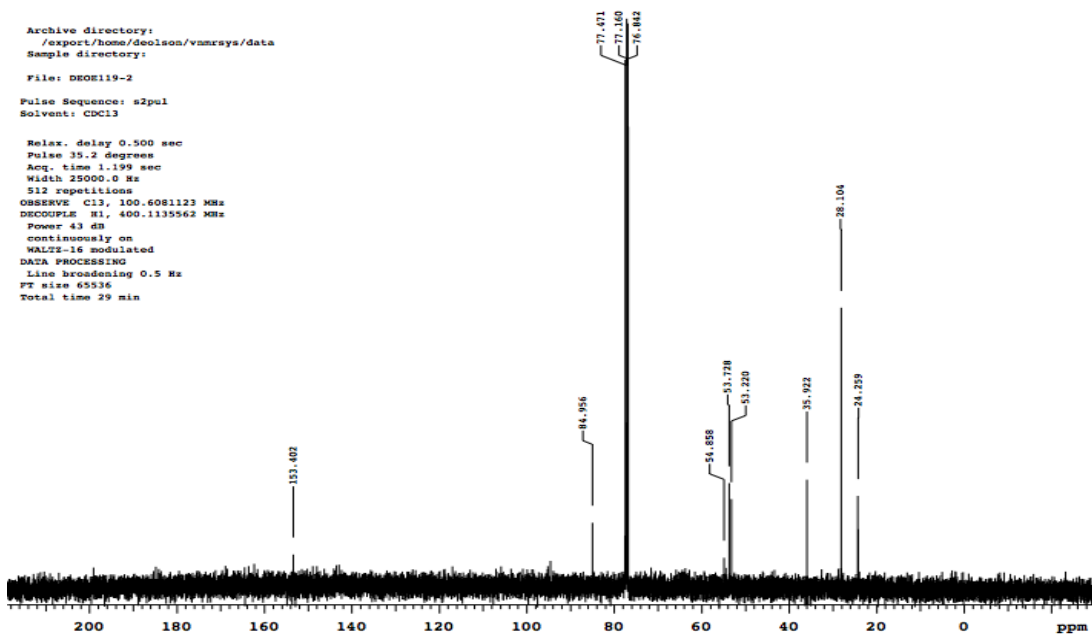

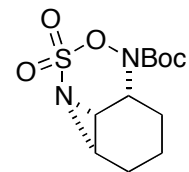

Table 1, entry 7 product

STANDARD IN OBSERVE

Archive directory:  
/export/home/deolson/vnmrsvs/data  
Sample directory:

File: DEOE123-2

Pulse Sequence: s2pul  
Solvent: CDCl3

Relax. delay 0.500 sec  
Pulse 59.0 degrees  
Acq. time 4.002 sec  
Width 4997.5 Hz  
16 repetitions  
OBSERVE H1, 400.1115374 MHz  
DATA PROCESSING  
FT size 65536  
Total time 1 min

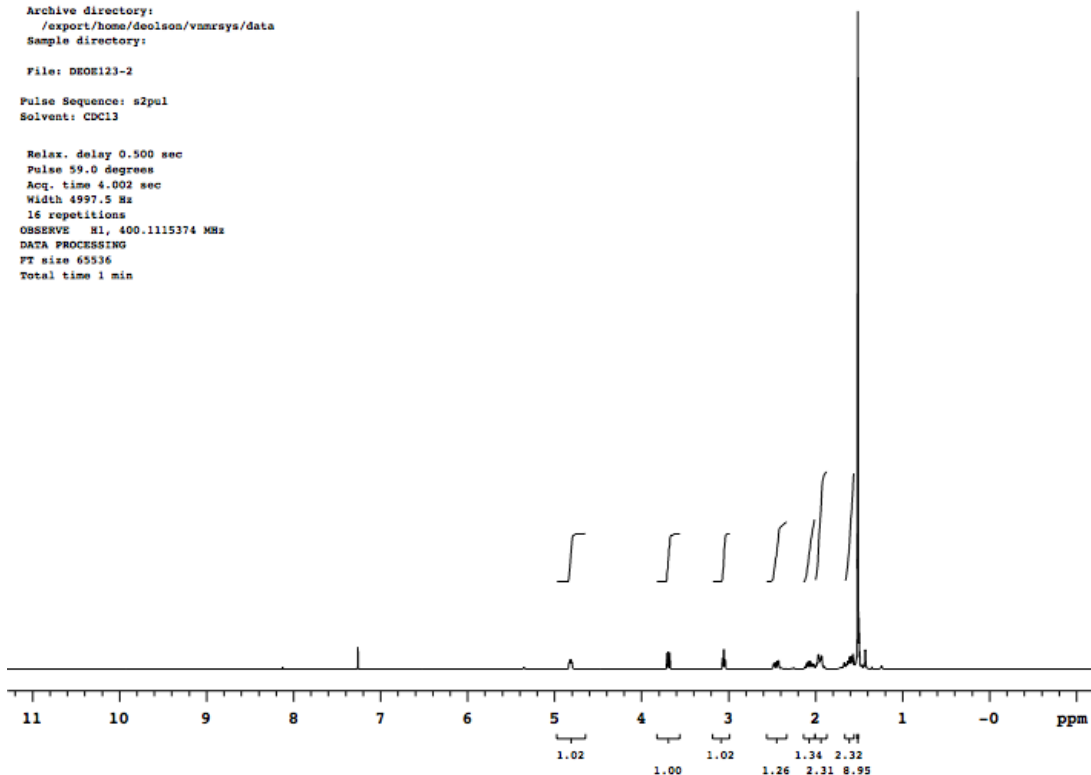

13C OBSERVE

Archive directory:  
/export/home/deolson/vnmrsvs/data  
Sample directory:

File: DEOE123-3

Pulse Sequence: s2pul  
Solvent: CDCl3

Relax. delay 0.500 sec  
Pulse 35.2 degrees  
Acq. time 1.199 sec  
Width 25000.0 Hz  
720 repetitions  
OBSERVE C13, 100.6081139 MHz  
DECOUPLE H1, 400.1135562 MHz  
Power 43 dB  
continuously on  
WALTZ-16 modulated  
DATA PROCESSING  
Line broadening 0.5 Hz  
FT size 65536  
Total time 29 min

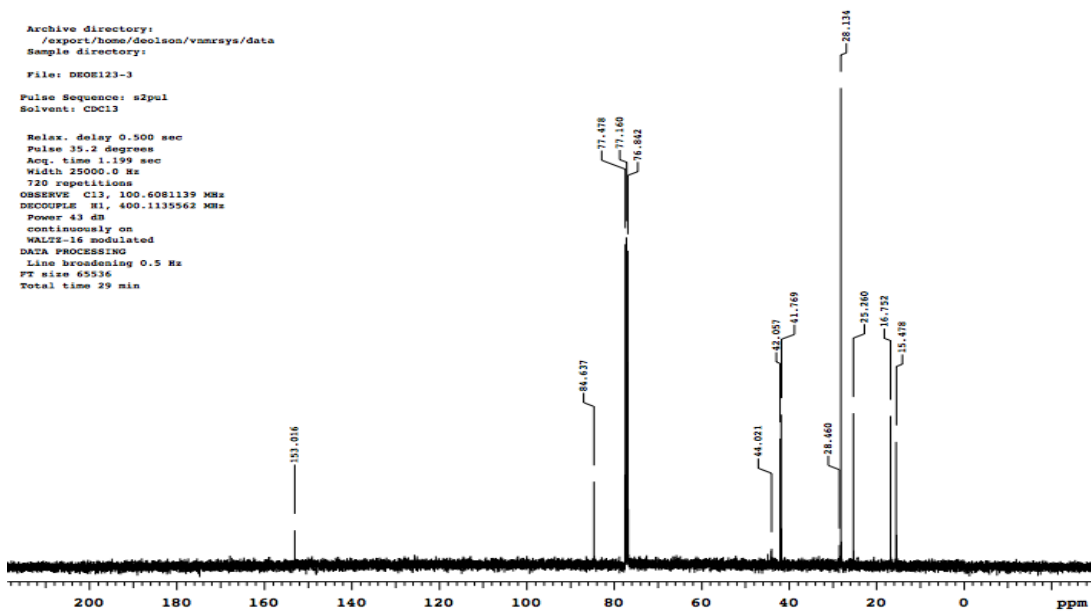

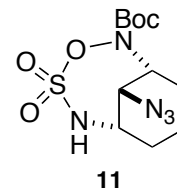

STANDARD IN OBSERVE

Archive directory:  
 /export/home/deolson/vmmsys/data  
 Sample directory:

File: DEOD93-2

Pulse Sequence: s2pul  
 Solvent: CD3CN  
 Temp. 70.0 C / 343.1 K

Relax. delay 0.500 sec  
 Pulse 59.0 degrees  
 Acq. time 4.002 sec  
 Width 4997.5 Hz  
 16 repetitions  
 OBSERVE M1, 400.113628 MHz  
 DATA PROCESSING  
 FT size 65536  
 Total time 1 min

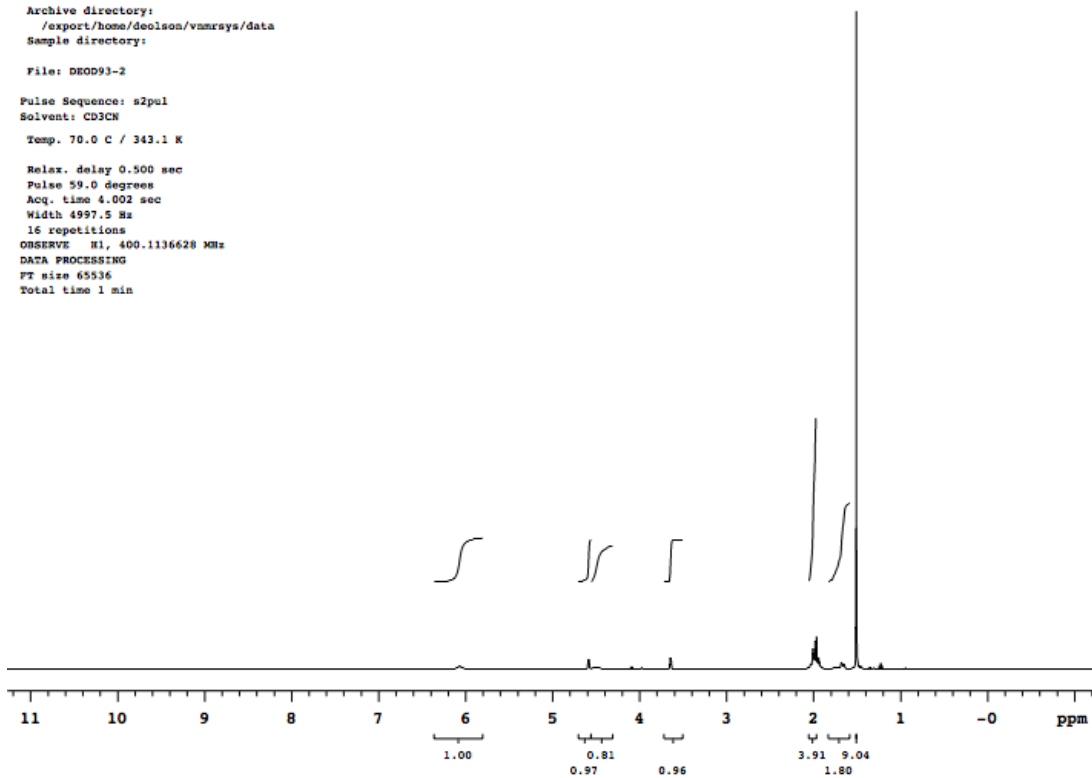

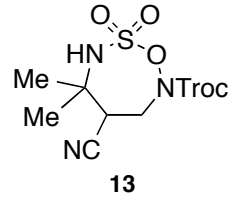

STANDARD 1H OBSERVE

Archive directory:  
/export/home/deolson/vnmrsws/data  
Sample directory:

File: DEOE161-4

Pulse Sequence: s2pul  
Solvent: CD3CN

Relax. delay 0.500 sec  
Pulse 60.0 degrees  
Acq. time 4.002 sec  
Width 4997.5 Hz  
16 repetitions  
OBSERVE H1, 400.1136634 MHz  
DATA PROCESSING  
FT size 65536  
Total time 1 min

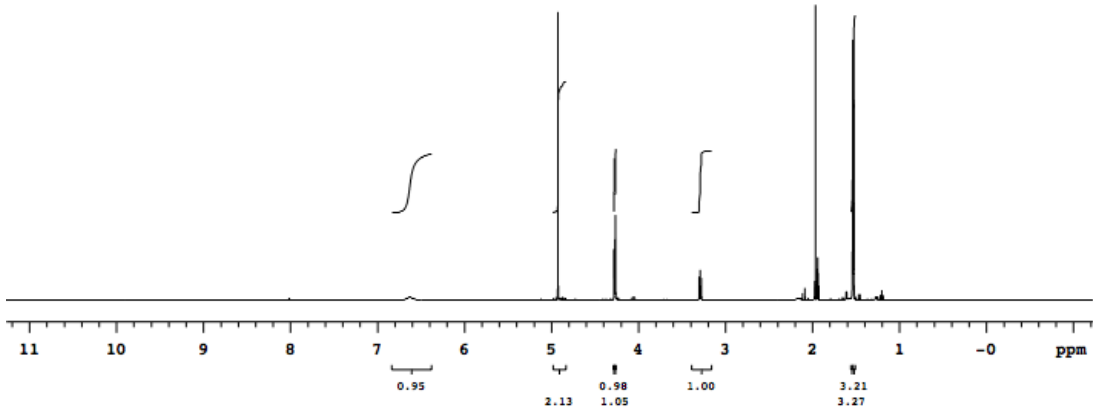

13C OBSERVE

Archive directory:  
/export/home/deolson/vnmrsws/data  
Sample directory:

File: DEOE161-5

Pulse Sequence: s2pul  
Solvent: CDCl3

Relax. delay 0.500 sec  
Pulse 38.1 degrees  
Acq. time 1.199 sec  
Width 25000.0 Hz  
176 repetitions  
OBSERVE C13, 100.6085632 MHz  
DECOUPLE H1, 400.1135562 MHz  
Power 43 dB  
continuously on  
WALTZ-16 modulated  
DATA PROCESSING  
Line broadening 0.5 Hz  
FT size 65536  
Total time 29 min

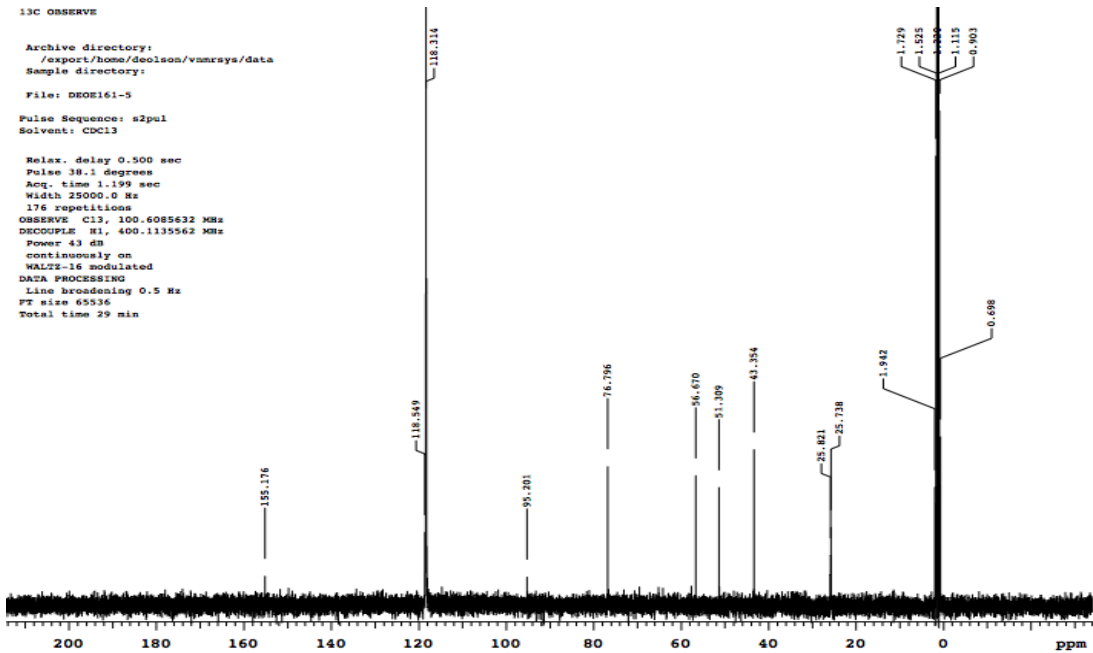

Std proton

Archive directory:  
Sample directory:  
File: DEOE161-7  
Pulse Sequence: s2pul  
Solvent: cd3od  
Temp. 25.0 C / 298.1 K  
Relax. delay 0.200 sec  
Pulse 45.0 degrees  
Acq. time 4.000 sec  
Width 9611.9 Hz  
16 repetitions  
OBSERVE H1, 599.7996482 MHz  
DATA PROCESSING  
FT size 131072  
Total time 1 min

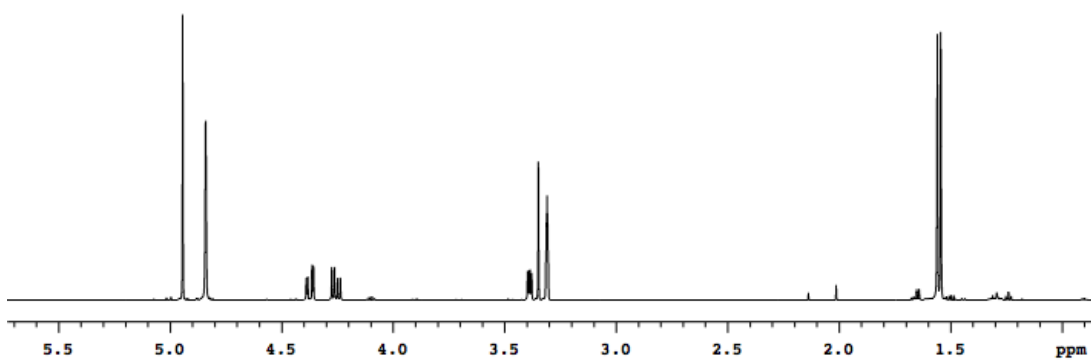

HSQC

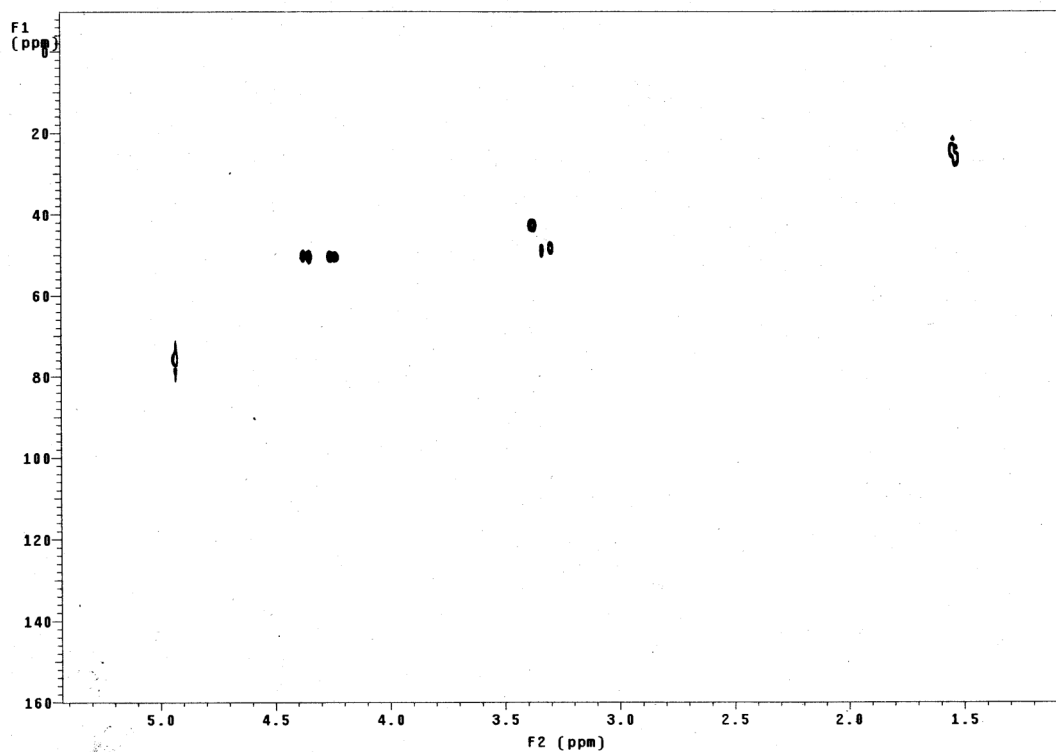

HMBC

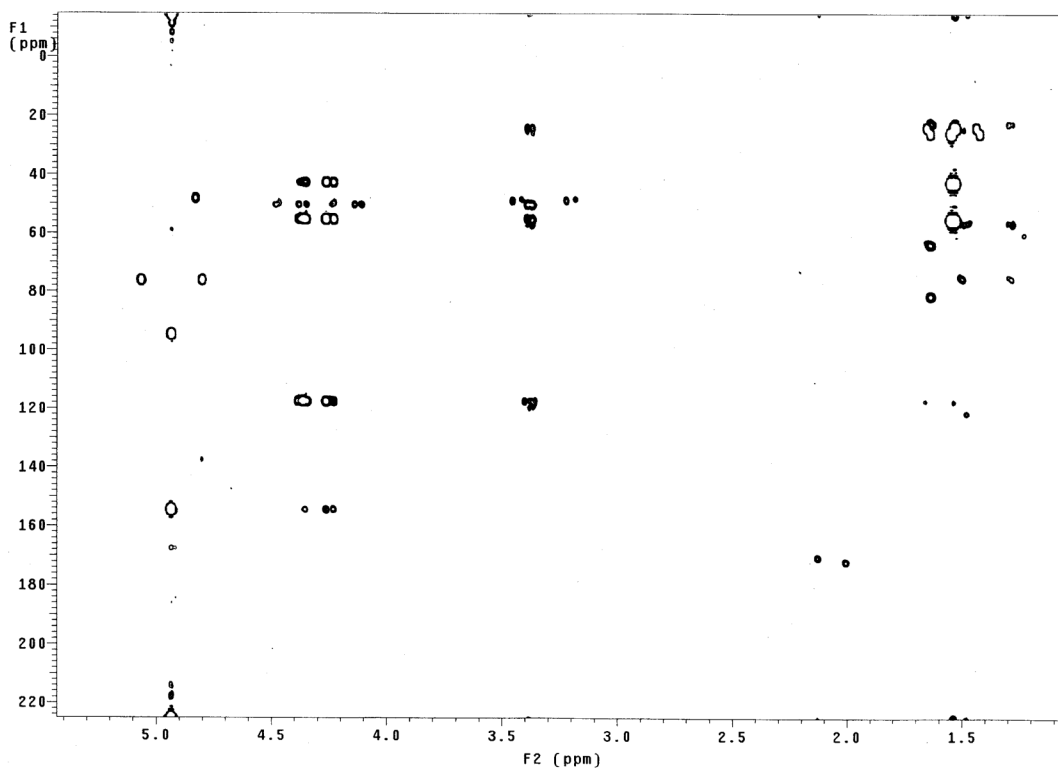

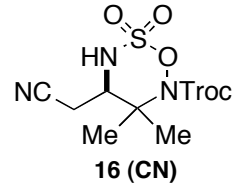

STANDARD IN OBSERVE

Archive directory:  
/export/home/deolson/vnmrsvs/data  
Sample directory:

File: DEOE193-1

Pulse Sequence: s2pul  
Solvent: CD3OD

Relax. delay 0.500 sec  
Pulse 60.0 degrees  
Acq. time 4.002 sec  
Width 4997.5 Hz  
16 repetitions  
OBSERVE H1, 400.1131115 MHz  
DATA PROCESSING  
FT size 65536  
Total time 1 min

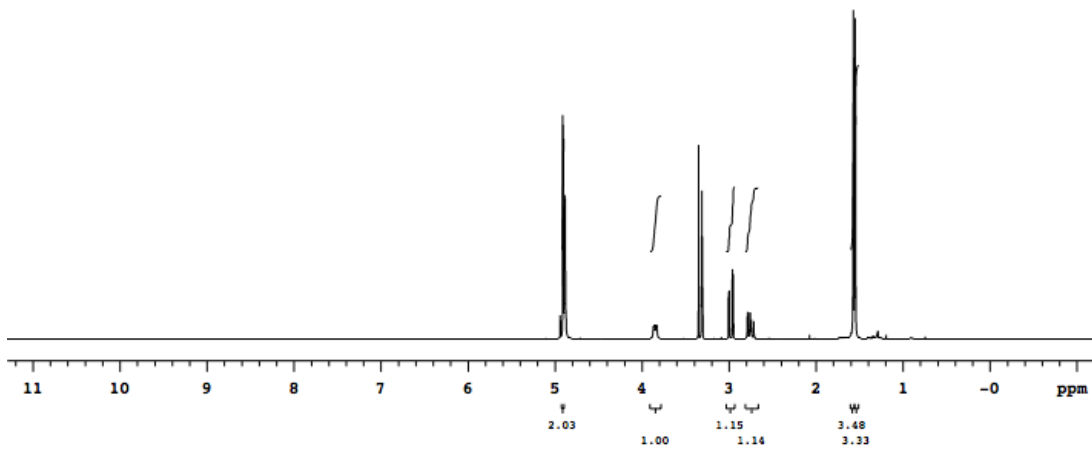

15N HMBC

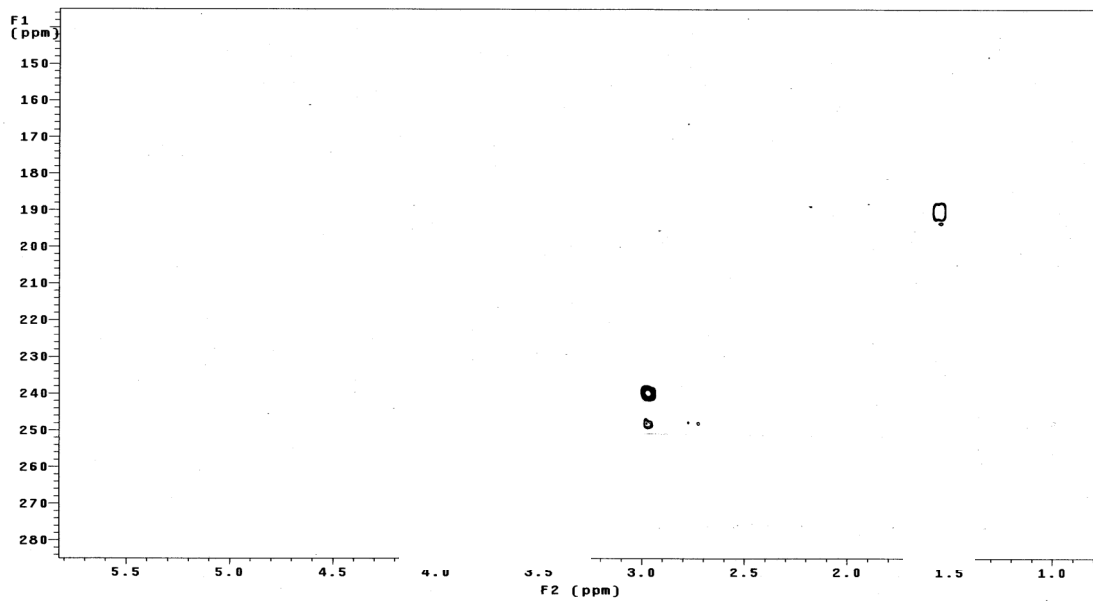

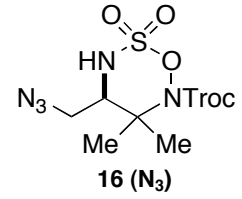

STANDARD 1H OBSERVE

Archive directory:  
/export/home/deolson/vnmrsvs/data  
Sample directory:

File: DEOE139-7

Pulse Sequence: s2pul  
Solvent: CDCl3

Relax. delay 0.500 sec  
Pulse 59.0 degrees  
Acq. time 4.002 sec  
Width 4997.5 Hz  
16 repetitions  
OBSERVE H1, 400.1115368 MHz  
DATA PROCESSING  
FT size 65536  
Total time 1 min

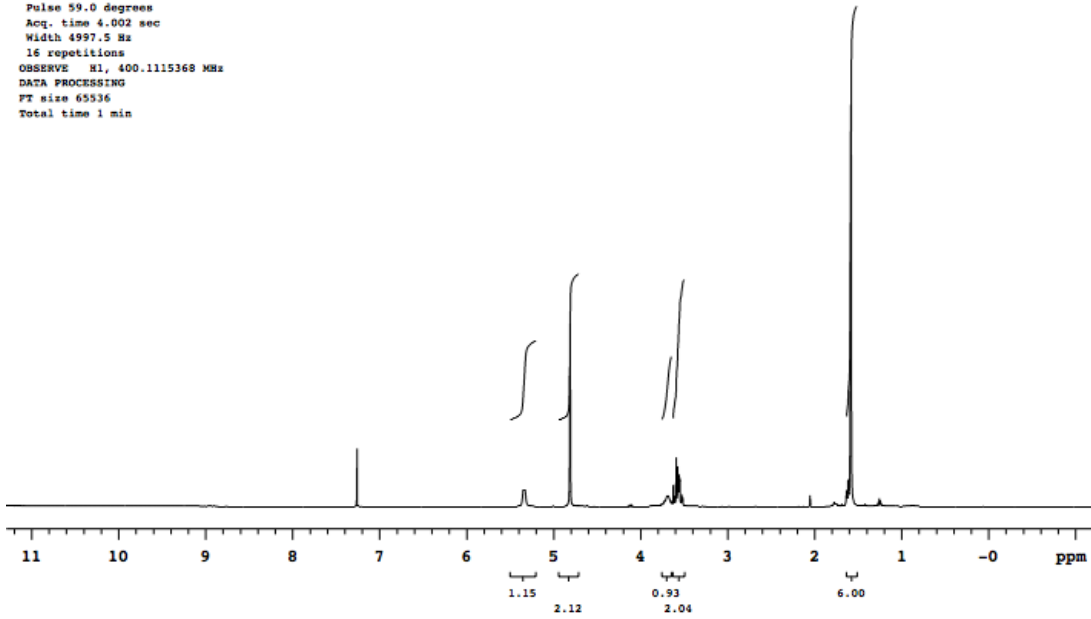



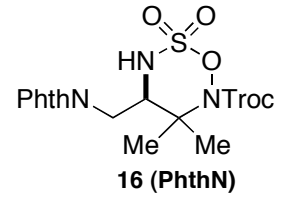

8H6 proton

Archive directory.  
 Sample directory.  
 File: nm-4-036-1hok  
 Pulse Sequence: s2pul  
 Solvent: cdcl3  
 Relax. delay 0.500 sec  
 Pulse 45.0 degrees  
 Acq. time 4.000 sec  
 Width 5605.4 Hz  
 S2 repetition  
 OBSERVE H1, 299.7291442 MHz  
 DATA PROCESSING  
 FT size 65536  
 Total time 4 min

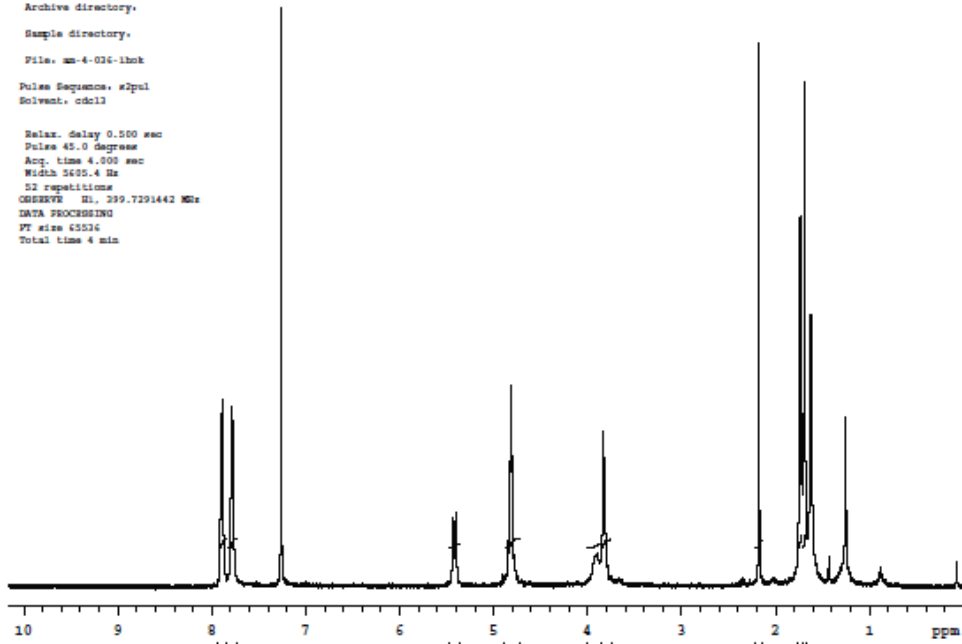

C13par  
 Archive directory:  
 /export/home/autumn/vmrsvs/data  
 Sample directory:  
 File: nm-6-phth-13c  
 Pulse Sequence: s2pul  
 Solvent: Acetone  
 User: 1-18-87  
 Relax. delay 0.500 sec  
 Pulse 38.2 degrees  
 Acq. time 1.500 sec  
 Width 33003.3 Hz  
 372 repetitions  
 OBSERVE C13, 125.6625263 MHz  
 DECOUPLE H1, 499.7531542 MHz  
 Power 43 dB  
 continuously on  
 WALTZ-16 modulated  
 DATA PROCESSING  
 Line broadening 2.0 Hz  
 FT size 131072  
 Total time 34 min

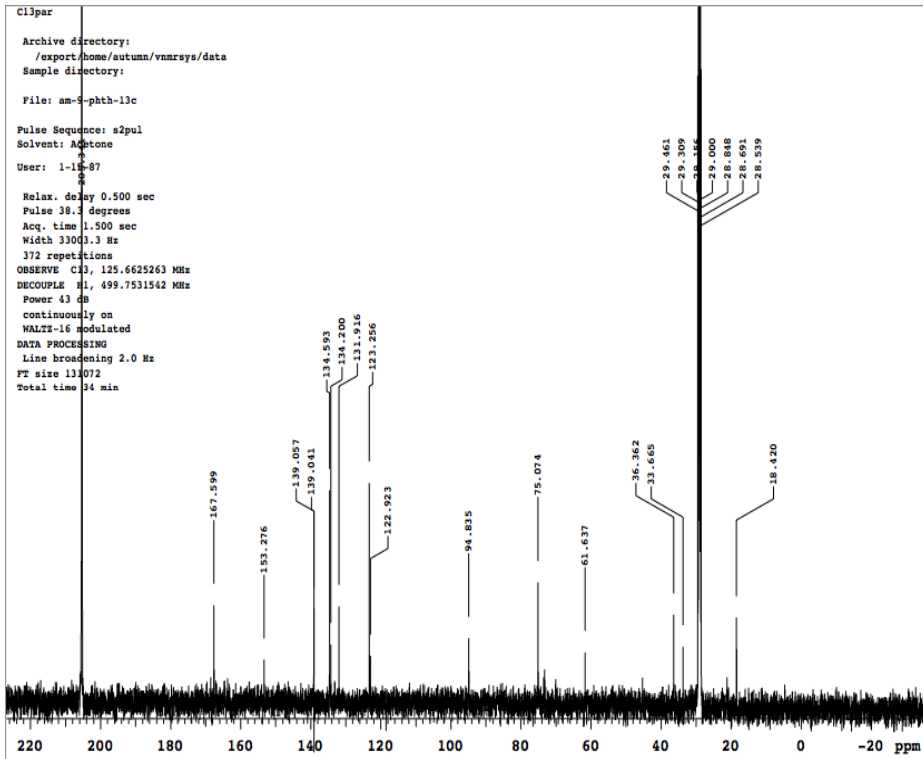

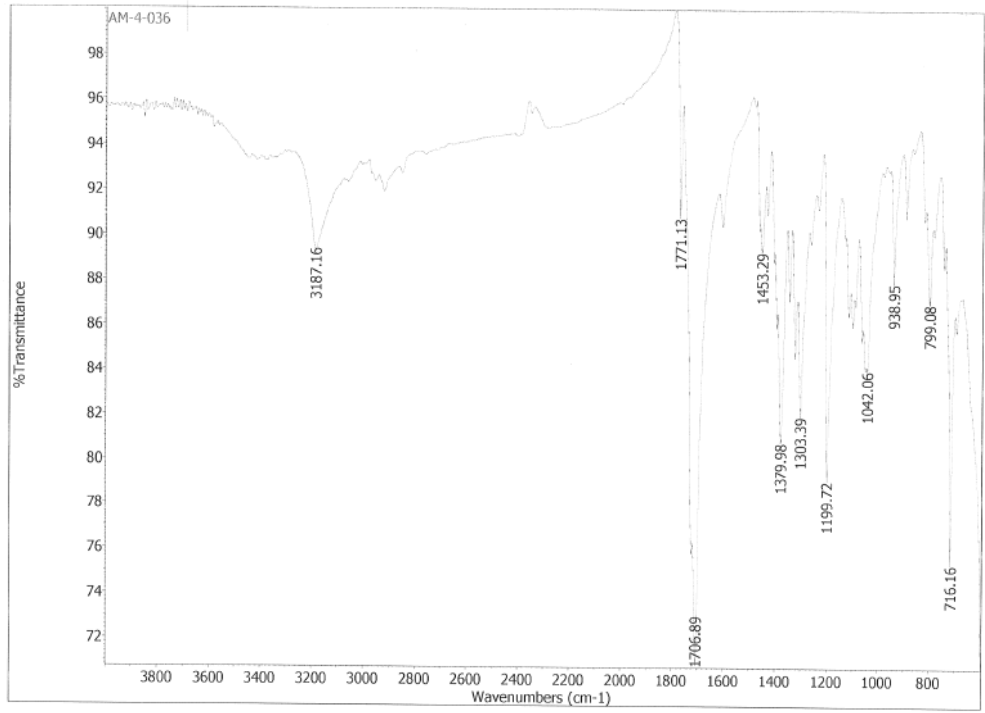

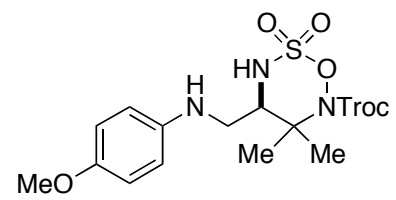

**16 (NHC<sub>6</sub>H<sub>4</sub>OMe)**

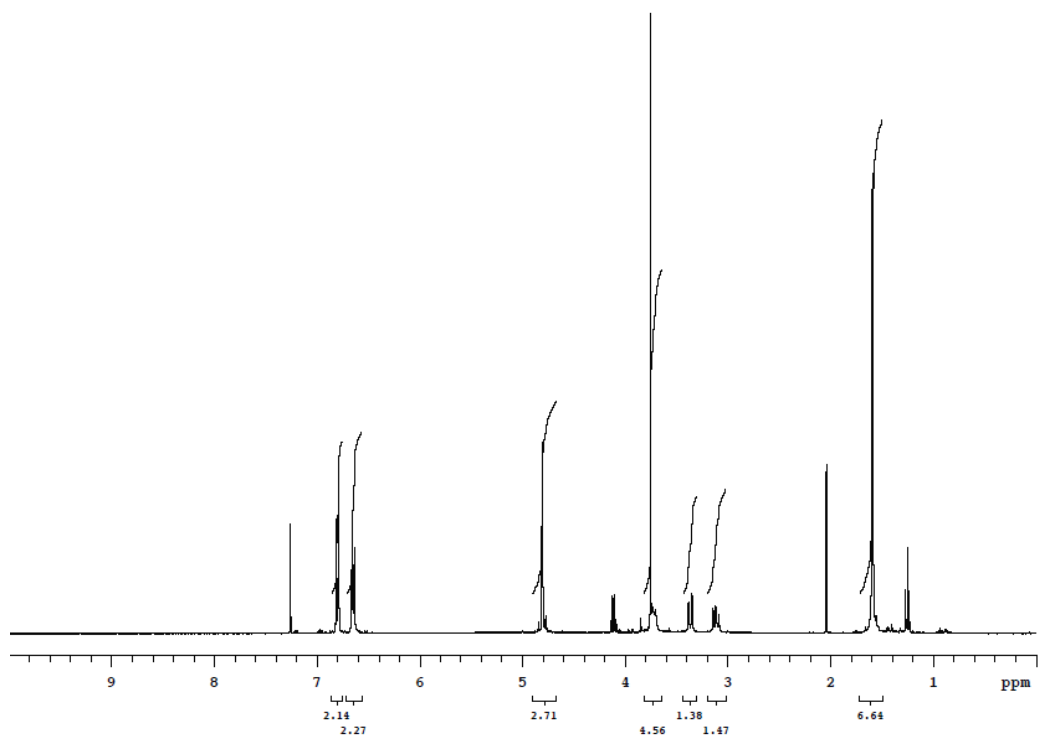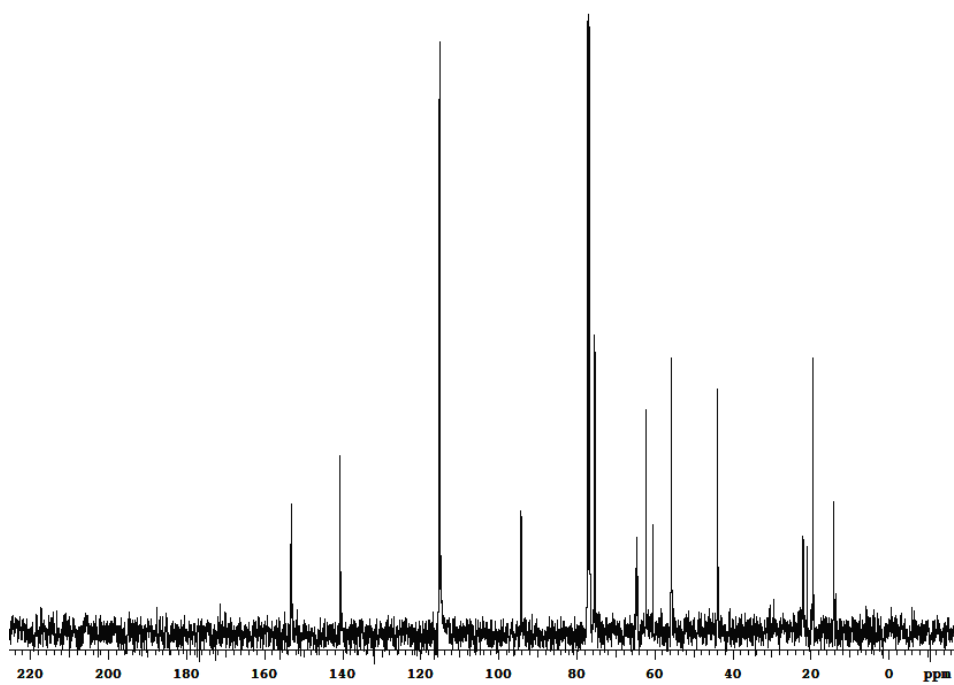

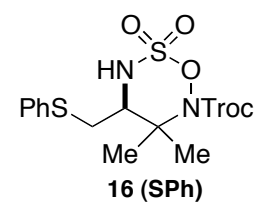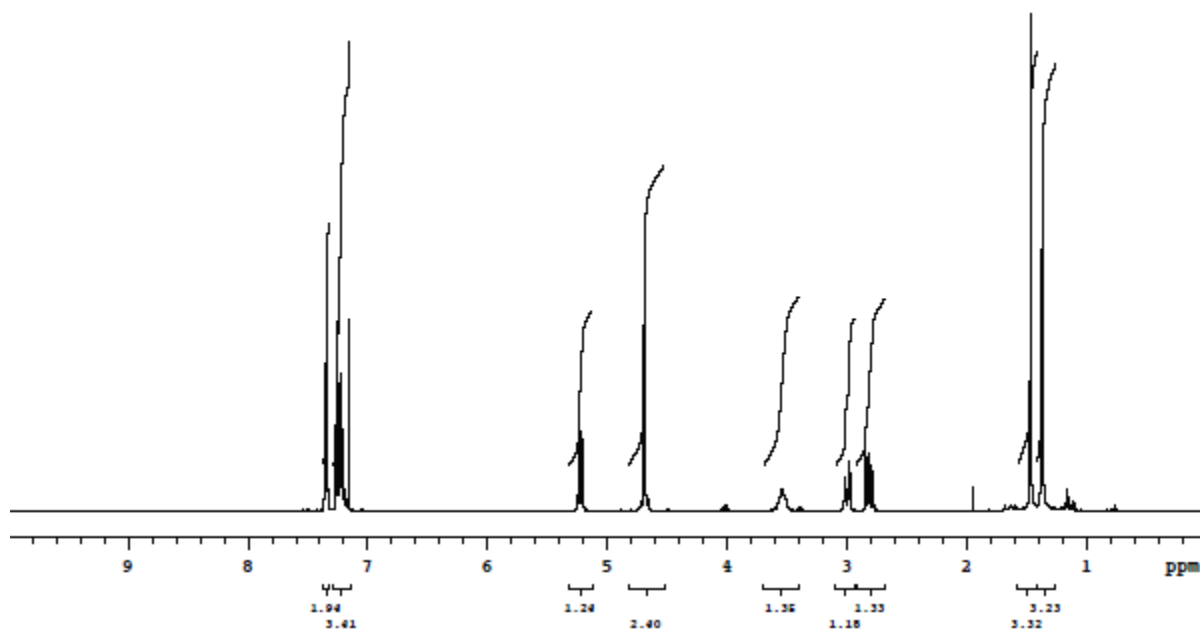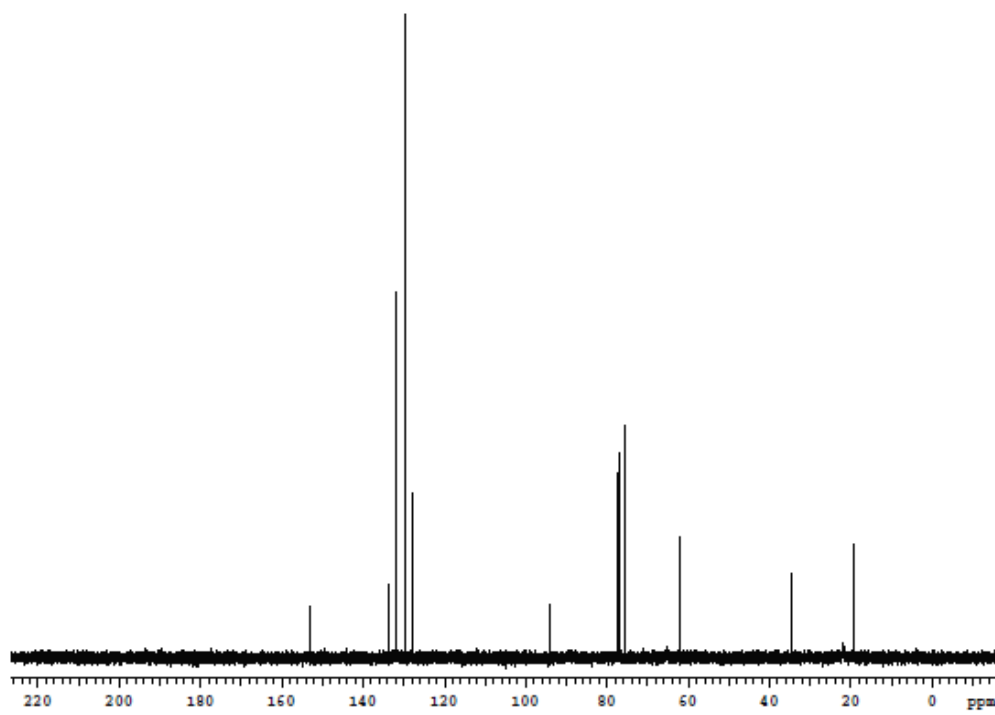

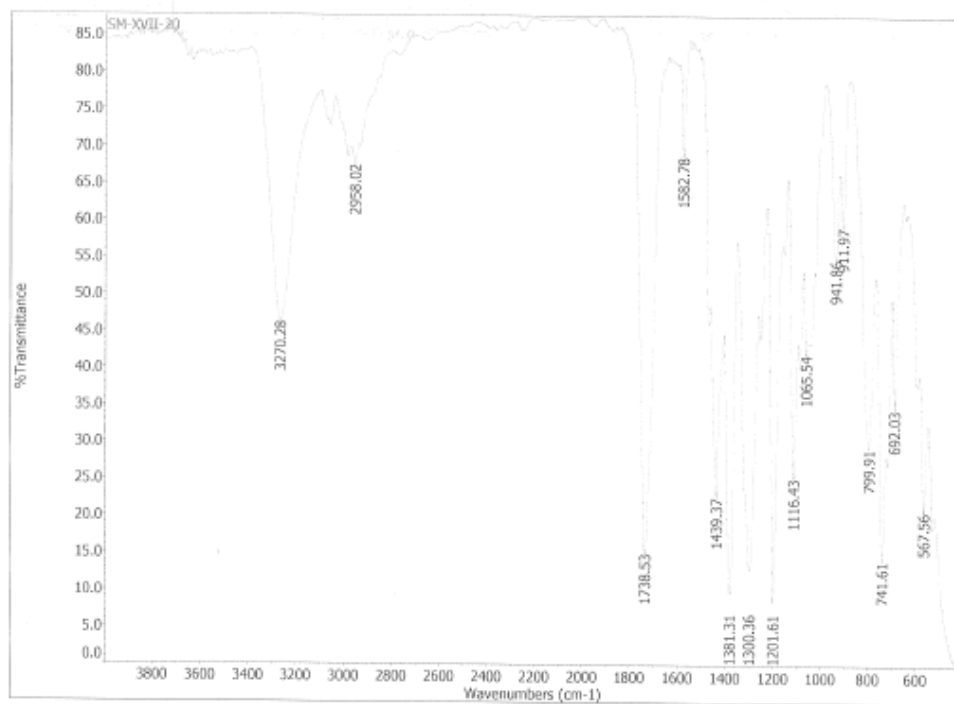

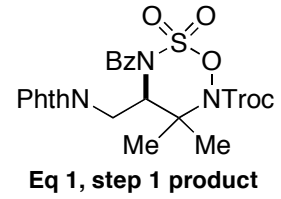

STANDARD PROTON PARAMETERS

Archive directory:  
 /export/home/autumn/vmrsys/data  
 Sample directory:  
 File: am-benzoyl-031111-1h  
 Pulse Sequence: s2pul  
 Solvent: CDCl3  
 Temp. 25.0 C / 298.1 K  
 User: 1-15-87

Relax. delay 0.500 sec  
 Pulse 52.5 degrees  
 Acq. time 4.000 sec  
 Width 8000.0 Hz  
 56 repetitions  
 OBSERVE H1, 599.7972882 MHz  
 DATA PROCESSING  
 FT size 65536  
 Total time 9 min

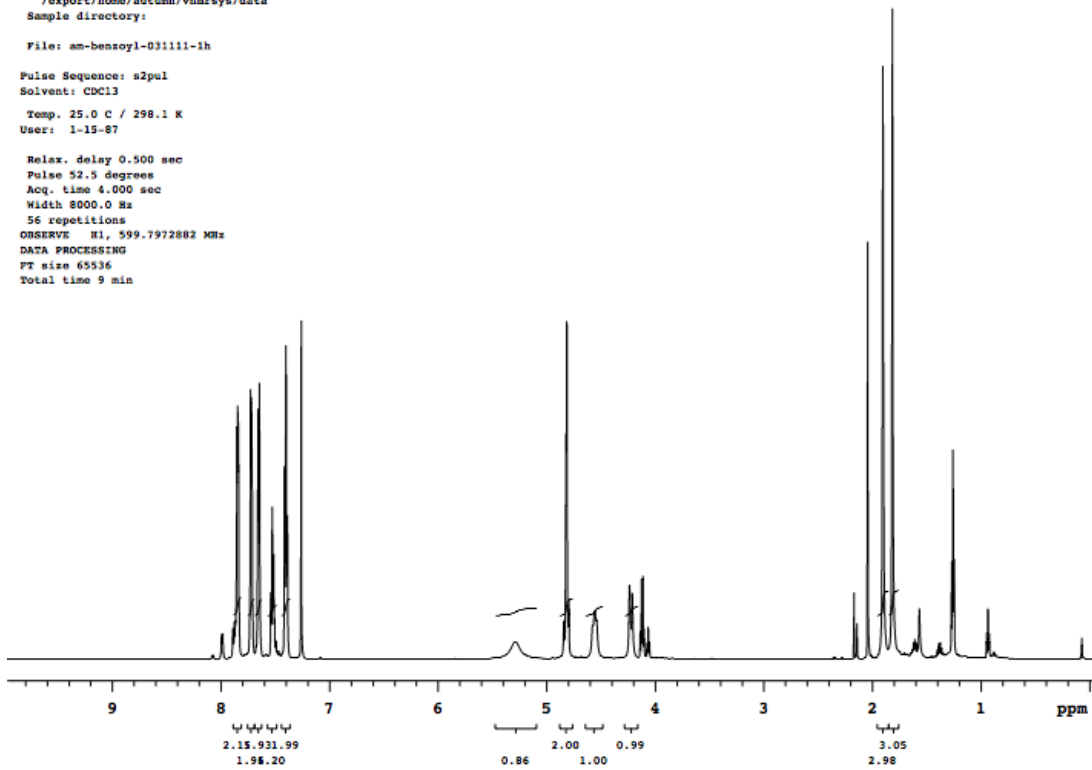

13C NMR

Archive directory:  
 /export/home/autumn/vmrsys/data  
 Sample directory:  
 File: am-0-012-13c  
 Pulse Sequence: s2pul  
 Solvent: CDCl3  
 Pulse 31.0 degree  
 Acq. time 1.915 sec  
 Width 14501.7 Hz  
 214 repetitions  
 OBSERVE C13, 75.4213614 MHz  
 DECOUPLE H1, 299.0470487 MHz  
 Power 30 dB  
 Continuously on  
 MALTZ-14 modulated  
 DATA PROCESSING  
 Line broadening 1.0 Hz  
 FT size 65536  
 Total time 1 hr, 2 min

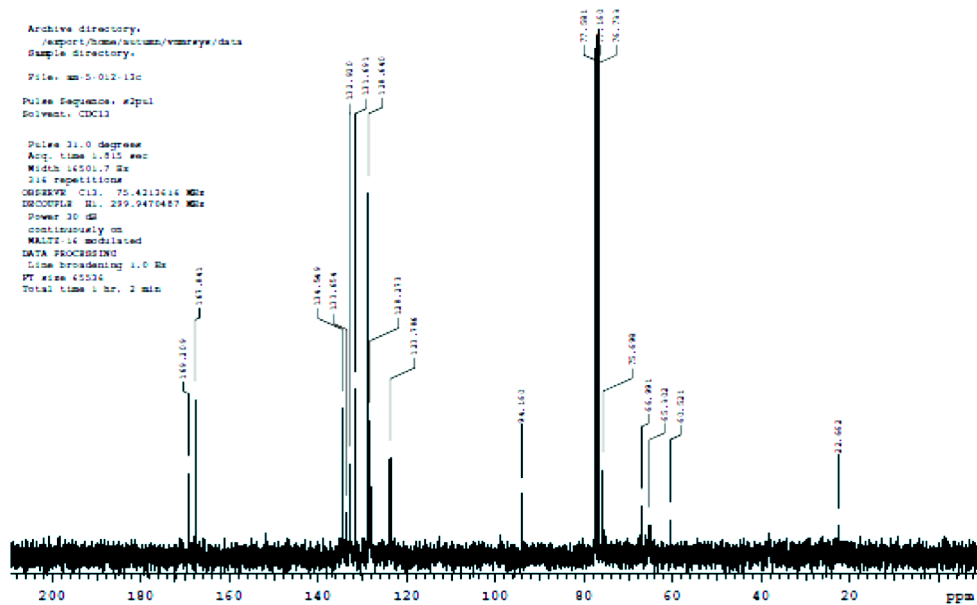

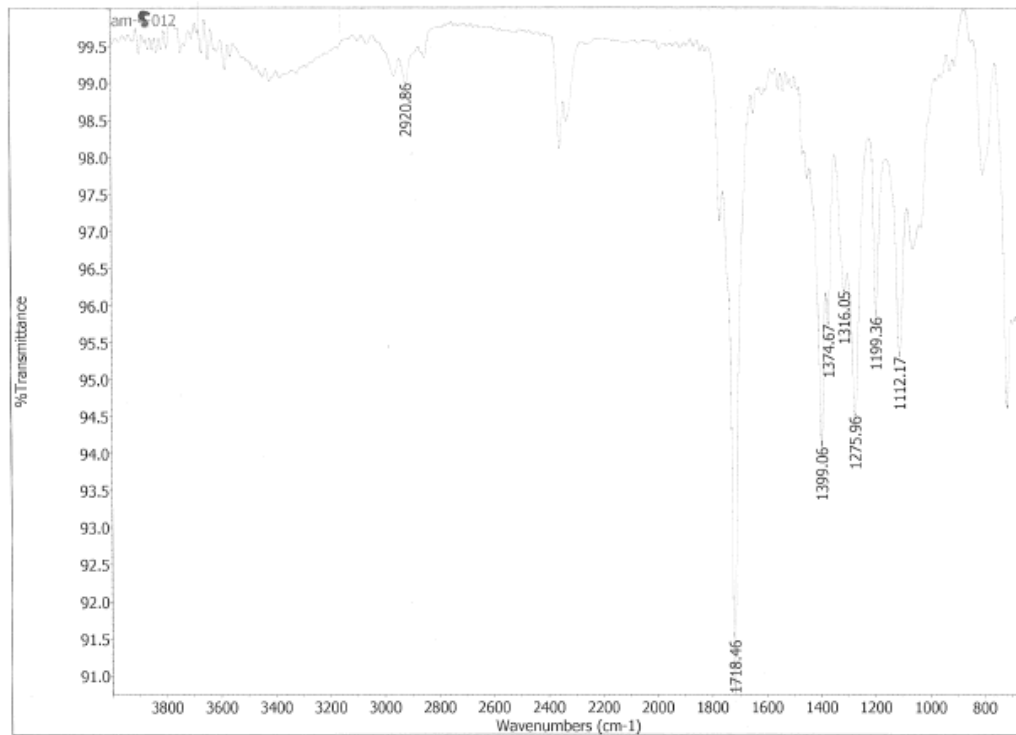

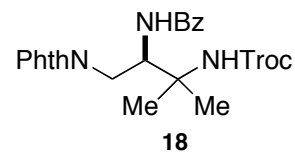

STANDARD PROTON PARAMETERS

Archive directory:  
 /export/home/autumn/vmrays/data  
 Sample directory:

File: an-reducedbenz

Pulse Sequence: s2pul  
 Solvent: CDCl3  
 Temp. 25.0 C / 298.1 K  
 User: 1-15-87

Relax. delay 0.500 sec  
 Pulse 52.5 degrees  
 Acq. time 4.000 sec  
 Width 8000.0 Hz  
 32 repetitions  
 OBSERVE H1, 599.7972879 MHz  
 DATA PROCESSING  
 FT size 65536  
 Total time 9 min

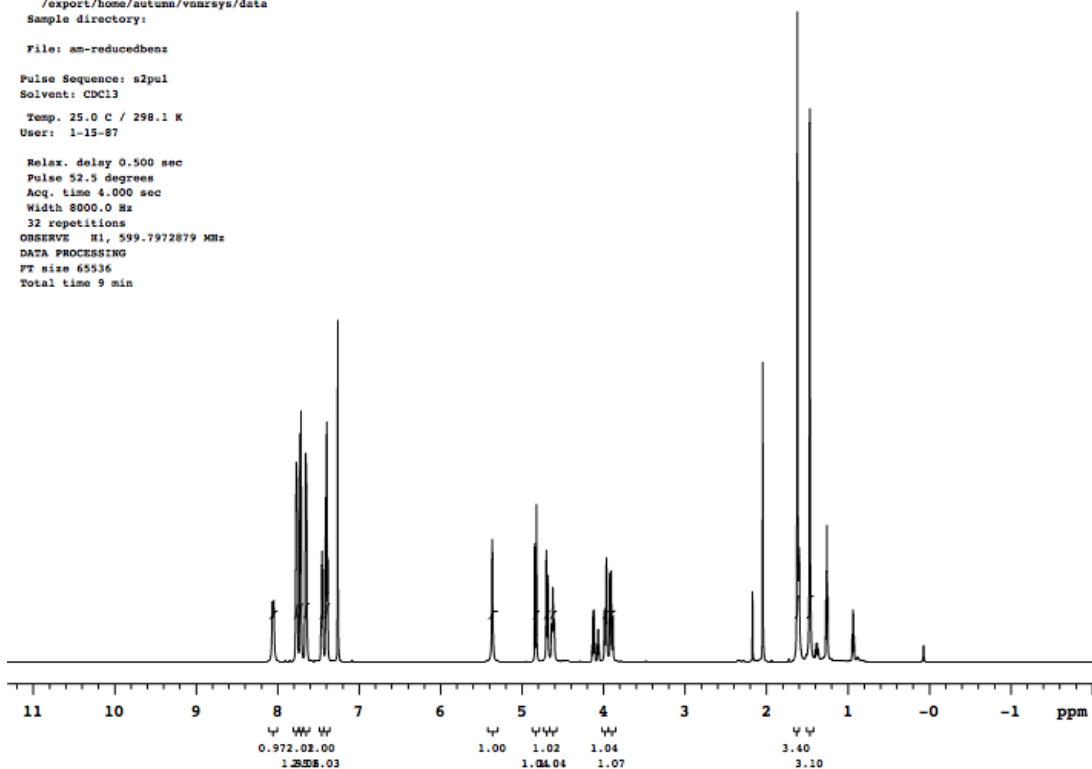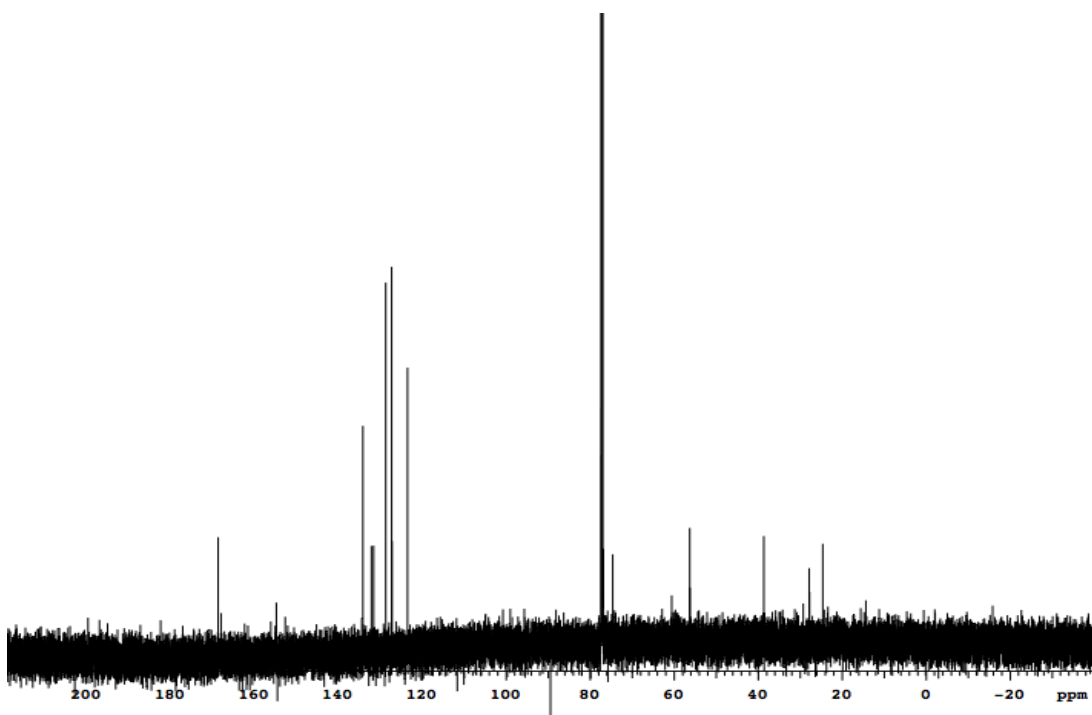



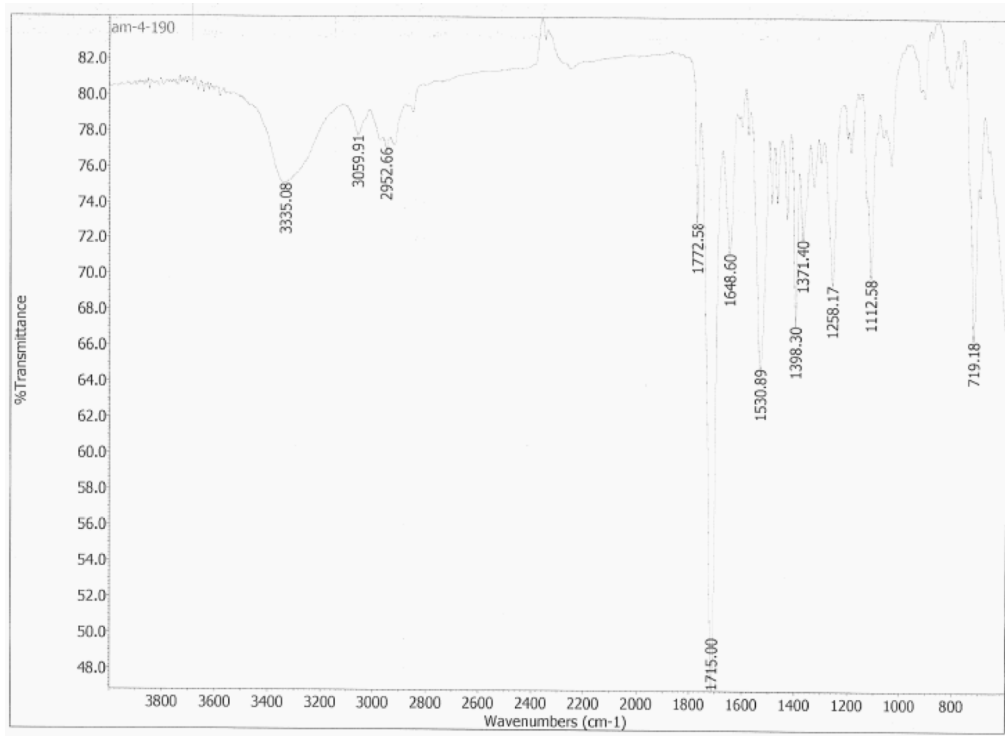

Supplement: NIHMS300735-supplement-2_si_002.pdf [file NIHMS300735-supplement-2_si_002.pdf]
